1 **Structural basis of cowpox evasion of NKG2D immunosurveillance**

2

3 Eric Lazear<sup>1,9,12</sup>, Michel M. Sun<sup>3,11,12</sup>, Xiaoli Wang<sup>1,2</sup>, Theresa L. Geurs<sup>3</sup>, Christopher A. Nelson<sup>1</sup>,  
4 Jessica A. Campbell<sup>4,8</sup>, Danna Lippold<sup>3</sup>, Alexander S. Krupnick<sup>5,10</sup>, Randall S. Davis<sup>6</sup>, Leonidas  
5 N. Carayannopoulos<sup>4,7</sup>, Anthony R. French<sup>1,3\*</sup> and Daved H. Fremont<sup>1,2\*</sup>

6

7 Departments of Pathology & Immunology<sup>1</sup>, Biochemistry & Molecular Biophysics<sup>2</sup>, Pediatrics<sup>3</sup>,  
8 Internal Medicine<sup>4</sup>, and Surgery<sup>5</sup> Washington University in St. Louis, St. Louis, Missouri, USA;  
9 Departments of Medicine, Microbiology, and Biochemistry and Molecular Genetics<sup>6</sup>, University  
10 of Alabama at Birmingham, Birmingham, AL 35294

11

12 <sup>7</sup>Current address: Celgene Pharmaceutical Company, Summit, NJ.

13 <sup>8</sup>Current address: Pfizer Inc., St. Louis, MO.

14 <sup>9</sup>Current address: Courier Therapeutics, Houston, TX.

15 <sup>10</sup>Current address: Department of Surgery, University of Virginia, Charlottesville, VA.

16 <sup>11</sup>Current address: Department of Ophthalmology, University of California, Los Angeles, CA.

17

18 <sup>12</sup>These authors contributed equally to this work

19

20

21

22 \* Co-corresponding authors:

23 [fremont@wustl.edu](mailto:fremont@wustl.edu), phone: 314-255-6171, fax: 314-362-8888

24 [french\\_a@kids.wustl.edu](mailto:french_a@kids.wustl.edu), phone: 314-286-2885; fax: 314-286-2895

25

26 Running title: Structural basis of NKG2D viral subversion

27

28

1 **Abstract**

2

3 NKG2D is a key component of cytotoxic antitumor and antiviral responses. Multiple  
4 viruses evade NKG2D recognition by blocking NKG2D ligand expression on infected cells. In  
5 contrast, cowpox virus targets NKG2D directly by encoding a secreted antagonist,  
6 Orthopoxvirus MHC Class I-like Protein (OMCP). We have previously reported that OMCP also  
7 binds to the orphan receptor FcRL5 on innate B cells. Here, we demonstrate that mammalian-  
8 derived, glycosylated OMCP binds NKG2D but not FcRL5. Cowpox viruses either lacking  
9 OMCP, or expressing an NKG2D-binding deficient mutant, are significantly attenuated in wild  
10 type and FcRL5-deficient mice but not NKG2D-deficient mice, demonstrating that OMCP is  
11 critical in subverting NKG2D-mediated immunity *in vivo*. Next we determined the structure of  
12 OMCP bound to human NKG2D. Despite a structure similar to that of host NKG2D ligands,  
13 OMCP uses a drastically different orientation for NKG2D binding. The re-orientation of OMCP  
14 is associated with dramatically higher affinity for human NKG2D and the targeted interface is  
15 highly conserved in mammalian NKG2Ds, increasing the zoonotic potential of cowpox virus. We  
16 also show that cell surface presented OMCP can trigger NKG2D effector functions equivalently  
17 to host NKG2D ligands, demonstrating that NKG2D-mediated signaling requires clustering but is  
18 insensitive to binding orientation. Thus, in contrast to TCR/MHC interactions, the docking  
19 topology of NKG2D with its ligands does not appear to regulate its activation.

20

21

22

23

24

25

## 1 **Author Summary**

2

3 Virally infected or tumor-transformed cells display NKG2D ligands (NKG2DLs) on their  
4 cell surface, which activates NKG2D-bearing lymphocytes to kill the transformed cell.  
5 Pathogens are known to counter this by blocking NKG2DL expression and/or surface display. In  
6 contrast, some tumor cells cleave endogenous NKG2DLs creating soluble NKG2D antagonists.  
7 Unlike other viral pathogens, cowpox virus uses a strategy analogous to cancer cells by  
8 targeting NKG2D directly with a soluble, high affinity NKG2D-antagonist named OMCP. We  
9 determined that OMCP's virulence *in vivo* is attributed to blocking NKG2D-mediated NK cell  
10 responses with no apparent effect due to binding to other receptors or cell types. We have also  
11 determined the crystal structure of cowpox OMCP bound to human NKG2D, revealing that  
12 despite conservation of the ligand scaffolding with host NKG2DLs, the viral protein is engaged  
13 with a radically altered orientation compared to all host NKG2DLs. Our structure provides key  
14 insight into how OMCP binds with an ~5,000-fold increased affinity compared to human  
15 NKG2DLs and show that the OMCP binding site is exceptionally conserved among primates  
16 and rodents, suggesting that the ability of OMCP to recognize this conserved interface  
17 contributes to the broad zoonotic potential of cowpox virus. Finally, we show that cell  
18 membrane-anchored OMCP can trigger equivalent NKG2D-mediated killing as host NKG2DLs,  
19 demonstrating that NKG2D signaling is insensitive to ligand binding orientation.

20

21

22

23

## 1 Introduction

2

3 Intracellular surveillance mediated by MHC class I (MHCI) is a critical host immune  
4 function and as such MHCI molecules are frequently targeted for destruction or intracellular  
5 retention by viruses [1]. Many herpesviruses encode at least one protein that prevents the cell  
6 surface expression of MHCI [1, 2]. However, this immune evasion strategy renders the infected  
7 cell susceptible to NK cell-mediated lysis due to loss of inhibitory signals [3]. Viral infection also  
8 leads to cell surface display of NKG2D ligands (NKG2DLs) recognized by the activating  
9 receptor NKG2D, further predisposing the infected cell towards NK cell-mediated lysis.  
10 Therefore, viruses that target MHCI expression often also sabotage NKG2D-mediated cell  
11 responses by targeting NKG2DLs on infected cells [4-7].

12 NKG2DLs are not normally expressed on the cell surface but can be induced by cellular  
13 stress [8]. The specific trigger for NKG2DL expression is not known, but NKG2DLs are  
14 upregulated in response to several viral infections [9-12]. NKG2DLs comprise a large group of  
15 proteins all recognized by NKG2D, despite having low sequence identity. NKG2DLs include the  
16 MIC (A and B) and ULBP (1-6) families in humans as well as MULT1 and the RAE-1 ( $\alpha$ - $\epsilon$ ) and  
17 H60 (a-c) families in mice [13]. The redundancy in NKG2DLs is likely due to a combination of  
18 tissue specific expression patterns of the ligands and the need to counter viral NKG2D evasion  
19 strategies [14]. Many viruses have evolved mechanisms to inhibit the cell surface expression of  
20 NKG2DLs as a means of interfering with NKG2D surveillance of viral infection. This strategy is  
21 most apparent among  $\beta$ - and  $\gamma$ -herpesviruses, in which four murine cytomegalovirus proteins  
22 (m138, m145, m152, m155) [15-18], two human cytomegalovirus proteins (UL16, UL142) [19,  
23 20] and one Kaposi's sarcoma-associated herpesvirus protein (K5) [21] have been  
24 demonstrated to block NKG2DL surface expression. This evasion strategy is also found in RNA  
25 viruses, as hepatitis C virus NS3/4a and human immunodeficiency virus Nef proteins also block  
26 the expression of a subset of NKG2DLs [22, 23]. Additionally, human cytomegalovirus, herpes

1 simplex virus type 1 and Epstein-Barr virus each also encode at least one miRNA that prevents  
2 translation of MICB [24, 25]. Similarly, JCV and BKV polyoma viruses target ULBP3 with  
3 miRNAs [26]. However, blocking NKG2DL expression on the infected cell is an imperfect  
4 evasion strategy, since no single viral protein or miRNA has been shown to block the  
5 expression of all NKG2DLs.

6 Like several herpesviruses, cowpoxvirus (CPXV) also sabotages MHCI expression.  
7 CPXV expresses CPXV012 and CPXV203, two proteins that prevent TAP-mediated peptide  
8 transport and MHCI trafficking to the cell surface, respectively [27-34]. Ectromelia virus, a  
9 related orthopoxvirus, induces NKG2DL expression, and NKG2D is critical for the control of  
10 ectromelia virus pathogenesis [35]. Infection with another orthopoxvirus, monkeypox virus, leads  
11 to dramatic expansion of NK cells but impaired NK cell function [36]. Together this suggests  
12 that CPXV infected cells would be sensitive to NK cell-mediated lysis.

13 Unlike herpesviruses, CPXV does not target NKG2DLs. Instead this virus targets  
14 NKG2D directly by encoding a competitive inhibitor of NKG2DLs, orthopoxvirus MHC class I-like  
15 protein (OMCP) [37, 38]. OMCP is a 152 residue protein that is secreted from infected cells and  
16 antagonizes the NKG2D-mediated killing of NKG2DL-expressing target cells [37]. OMCP also  
17 was reported to bind to B cells via Fc-receptor like protein 5 (FcRL5) and to  
18 monocyte/macrophages [39]. OMCP binds to murine NKG2D with an affinity equal or greater  
19 than all tested murine NKG2DLs, and to human NKG2D with an affinity ~5,000-fold higher than  
20 human NKG2DLs [37, 38, 40, 41].

21 Despite their divergence in sequence identity, all known host NKG2DLs share common  
22 structural features [42, 43]. NKG2DLs contain an MHCI-like platform domain composed of an  
23 eight-stranded beta sheet with two helices [44-48]. The platform domain is subdivided into  $\alpha 1$   
24 and  $\alpha 2$  domains, with each domain containing four beta strands and an alpha helix. Unlike  
25 MHCI, the groove between the helices of the NKG2DL platform domain is closed and therefore  
26 NKG2DLs do not bind peptides.

1 Like host NKG2DLs, OMCP also adopts an MHCI-like platform domain [38]. However,  
2 the platform domain of OMCP has been trimmed to have only a six-stranded beta sheet with  
3 shorter flanking helices. In this paper, we term the helix of the  $\alpha 1$  domain H1 and the  
4 discontinuous helix of the  $\alpha 2$  domain is termed H2a and H2b. The H2a and H2b helices of  
5 OMCP are also rearranged to be flatter against the beta sheet and to be splayed apart from  
6 each other. These differences in the OMCP structure were hypothesized to be important for the  
7 high affinity binding of OMCP to NKG2D. However, OMCP was still expected to bind to NKG2D  
8 in the same orientation as host NKG2DLs, i.e. with the alpha helices oriented diagonally within  
9 the symmetric NKG2D binding groove.

10 Here we report the 2.0 Å-resolution structure of human NKG2D bound to OMCP of the  
11 Brighton Red strain of cowpoxvirus. The structure reveals a significant reorientation of OMCP in  
12 the NKG2D binding groove relative to host NKG2DLs. The interface of OMCP with NKG2D is  
13 highly complementary, buries a significantly larger surface area than host NKG2DLs, and  
14 remains continuous across the entire NKG2D binding groove. This novel binding adaptation  
15 and high affinity allows OMCP to compete with the high local concentration of membrane-  
16 associated host NKG2DLs. We further show that the mechanism of NKG2D antagonism  
17 requires OMCP to be secreted, lest it lead to NKG2D signaling. Finally, we show that viruses  
18 expressing an NKG2D-binding deficient OMCP mutant are equivalently attenuated to viruses  
19 that do not express OMCP using mouse models of cowpox infection. Thus demonstrating that  
20 while FcRL5 plays no role in cowpox pathogenesis, OMCP is critical in attenuating NKG2D-  
21 mediated immunity.

22

## 23 **Results**

### 24 **CPXV lacking OMCP is significantly attenuated *in vivo*.**

25 While OMCP has been shown to bind to NKG2D and compete with NKG2D ligands *in vitro*, the  
26 effect of OMCP on CPXV virulence *in vivo* has not been determined. We generated an OMCP-

1 deficient ( $\Delta V018$ ) CPXV using a transient dominant selection strategy. Multi-step growth curves  
2 of the WT CPXV, OMCP-deficient CPXV, and a revertant CPXV demonstrated nearly identical  
3 replication growth kinetics (Fig. S1), indicating that OMCP is dispensable for viral growth or  
4 replication *in vitro*.

5         Next we investigated the impact of OMCP during systemic CPXV infection (via the  
6 intraperitoneal (i.p.) route) in WT B6 mice. Survival of WT mice infected with WT CPXV  
7 demonstrated dose dependence with an LD50 value of  $0.91 \times 10^6$  pfu/mouse (Fig. 1A).  
8 Comparison of the survival of WT mice infected i.p. with OMCP-deficient CPXV (Fig. 1B)  
9 revealed substantially greater survival in the mice infected with OMCP-deficient CPXV than with  
10 WT CPX. Indeed, the LD50 value of  $1.64 \times 10^6$  pfu/mouse for mice infected with OMCP-deficient  
11 CPXV demonstrated that CPXV lacking OMCP is attenuated *in vivo* compared to WT CPXV.  
12 Kaplan Meier survival curves of WT mice infected with the OMCP revertant CPXV correlate well  
13 with the survival observed following infection with WT CPXV (Fig. 1C), demonstrating that the  
14 decreased virulence observed during infection with OMCP-deficient CPXV reflects the absence  
15 of OMCP. Together, these results establish for the first time that OMCP facilitates CPXV  
16 virulence *in vivo*.

17  
18 **Structure determination of OMCP-NKG2D.** We had previously solved the structure of OMCP  
19 alone and shown that, similar to host NKG2DLs, OMCP adopts an MHC-I-like platform domain  
20 [38]. Despite the overall similarity of the domain structure of OMCP to host NKG2DLs, OMCP  
21 had several notable deviations in the putative NKG2D-binding site that were hypothesized to be  
22 important for the high affinity binding of OMCP to NKG2D. To further understand the unusually  
23 high affinity of OMCP for NKG2D, we crystallized and solved the structure of OMCP bound to  
24 human NKG2D.

25         Initial crystallization trials with OMCP and NKG2D yielded ~30 different crystallization  
26 conditions. Subsequent data collection and molecular replacement of multiple low-resolution

1 crystal forms all yielded similar partial solutions, with alternating sheets of OMCP-NKG2D  
2 complexes separated by undefined density. In the original structure of OMCP alone, the beta  
3 sheets packed to form a trimer with the alpha helices oriented away from the center [38]. An  
4 identical OMCP trimer formed in the OMCP-NKG2D partial solutions, with NKG2D now bound to  
5 the outward facing helices (data not shown). In an attempt to change the lattice packing, we  
6 introduced mutations into the beta sheet of OMCP that were designed to break the trimeric  
7 interface. These mutations were on the opposite face of OMCP from the NKG2D binding site to  
8 avoid disrupting OMCP-NKG2D binding. A mutant form of OMCP (Y23D, F95D) crystallized  
9 with NKG2D in a new space group and the crystals diffracted to 2.0 Å (Table 1)(Figure 2A).

10 The electron density map was continuous and unambiguous throughout all chains of the  
11 structure, with the exception of Q108 in OMCP. This residue was situated in the center of the  
12 largest loop of OMCP and unambiguous density for this residue was also absent from the  
13 structure of OMCP alone [38]. The structure of OMCP bound to NKG2D showed no major  
14 differences from our previous structure of OMCP alone, with an RMSD for all atoms of 0.8 Å.  
15 Likewise, NKG2D was also similar to previous NKG2D structures with RMSDs ranging from 0.5-  
16 0.9 Å. The  $\beta$ 3- $\beta$ 4 loop of NKG2D is the only region of either OMCP or NKG2D that displayed  
17 above-average B factors. This loop is thought to be flexible and has had above average B  
18 factors in all previous NKG2D structures [49]. Interestingly, the peptide bond between S193-  
19 S194 in our NKG2D structure had a *cis* conformation not described in other NKG2D structures  
20 (Figure S2).

21  
22 **The interface between OMCP and NKG2D.** OMCP was hypothesized to bind to the same  
23 surface of NKG2D used by host NKG2DLs because (i) OMCP competed with host NKG2DLs for  
24 NKG2D and (ii) mutations within the NKG2DL-binding pocket of NKG2D altered OMCP binding  
25 affinity [38]. OMCP does bind NKG2D using the same concave binding pocket as host  
26 NKG2DLs (Figure 2A). OMCP binds primarily using the discontinuous helices of its  $\alpha$ 2 domain,



1 H2a and H2b. The position of the H2a and H2b helices is such that every surface exposed side  
2 chain of both helices within the binding site directly contacts NKG2D (Figure 2B). Only two  
3 contacts are found outside of H2a and H2b, Ile49 and Arg66. Both of these residues are within  
4 the  $\alpha 1$  domain but lie outside of the H1 helix.

5 Twelve OMCP residues contact eighteen NKG2D residues to form a mixture of bond  
6 types (Table 2). Three residues in each NKG2D half-site are known as core binding residues  
7 because they make contacts with all known host NKG2DLs. The core residues of NKG2D  
8 subunit A (NKG2D<sup>A</sup>) (Tyr152, Tyr199, Met184) form two hydrogen bonds and make extensive  
9 hydrophobic contacts with OMCP residues. The core residues of NKG2D<sup>A</sup> contact four OMCP  
10 residues and the most critical of these residues is Phe122. Phe122 makes multiple hydrophobic  
11 contacts with all three NKG2D<sup>A</sup> core residues, including *pi*-stacking with Tyr152. Phe122 also  
12 forms a backbone-to-sidechain hydrogen bond with Tyr152. Interestingly, OMCP is the first  
13 NKG2D ligand not to utilize all six NKG2D core-binding residues, with only Met184 and Tyr152  
14 of NKG2D subunit B (NKG2D<sup>B</sup>) contacting OMCP. NKG2D<sup>B</sup> Met184 and Tyr152 each make a  
15 single hydrogen bond and hydrophobic contacts with OMCP residues. Two OMCP residues,  
16 Trp127 and Asp132, make contacts with both NKG2D protomers. OMCP Trp127 forms a  
17 hydrogen bond to Lys150 of NKG2D<sup>A</sup> and makes several hydrophobic contacts with Leu148 of  
18 NKG2D<sup>B</sup>, Lys150 and Ser151 of NKG2D<sup>A</sup>. OMCP Asp132 forms a hydrogen bond with Tyr152  
19 of NKG2D<sup>B</sup> and a salt bridge with Lys150 of NKG2D<sup>A</sup> (Figure 3A).

20 Due to the high affinity of the OMCP-NKG2D interaction we harnessed a high throughput  
21 *in vitro* selection approach to find NKG2D-binding null mutants (Table S1). The results of the  
22 screen identified D132 as an important residue for disrupting NKG2D binding. We then  
23 generated OMCP with the D132R mutation in an attempt to completely ablate NKG2D binding.  
24 The D132R mutant protein was unable to bind to NKG2D-expressing cells, but retained binding  
25 to FcRL5-expressing cells (Figure 3B). This mutation is likely to cause significant steric clashes,

1 as well as disrupting both interactions made by Asp132 to NKG2D<sup>A</sup> Lys150 and NKG2D<sup>B</sup>  
2 Tyr152 (Figure 3A).

3  
4 **The role of OMCP receptors in CPXV infection.** We generated a recombinant CPXV that  
5 expressed the D132R mutant OMCP to isolate the effect of OMCP binding to NKG2D from  
6 binding to FcRL5. A multi-step growth curve of (D132R) OMCP CPXV demonstrated identical  
7 replication growth kinetics to WT CPXV (Fig. S1). Cowpox and its close relatives variola virus,  
8 vaccinia virus, and monekeypox can be spread via contact and aerosol transmission [50];  
9 therefore, we choose to study the role of OMCP during acute intranasal (i.n.) infection. Using  
10 our series of WT OMCP expressing CPXV, OMCP-deficient CPXV ( $\Delta$ V018), and (D132R)  
11 OMCP mutant expressing CPXV in combination with WT, NKG2D-deficient, and FcRL5-  
12 deficient mice, we were able to delineate the impact of OMCP on NKG2D- and FcRL5-  
13 expressing cells during CPXV infection *in vivo*.

14 Mice were infected i.n. with  $2.5 \times 10^4$  pfu/mouse of WT, OMCP-deficient, or D132R CPXV  
15 virus. Infection with WT CPXV resulted in similar mortality in WT, NKG2D-deficient, and FcRL5-  
16 deficient mice (Fig. 4 solid lines). However, the complete loss of OMCP (Fig. 4, dashed lines)  
17 rendered CPXV severely attenuated in WT and FcRL5-deficient mice, while OMCP-deficient  
18 CPXV infection in NKG2D-deficient mice remained similarly lethal as WT CPXV. These results  
19 illustrated that under normal circumstances (*i.e.*, WT CPXV infection in WT mice), OMCP is able  
20 to effectively abrogate activation through the NKG2D receptor, rendering WT CPXV as lethal in  
21 WT mice as it is in NKG2D-deficient mice. Mice infected with the (D132R) OMCP CPXV (Fig. 4,  
22 dotted lines) phenocopied the mortality of mice infected with OMCP-deficient CPXV. The  
23 survival observed in the FcRL5-deficient mice following infection with each of the strains of  
24 CPXV closely mimicked that seen in WT mice (Figs. 4C vs 4A), indicating that there is no  
25 significant role of the FcRL5 receptor on survival following this route of infection. The significant  
26 attenuation of OMCP-deficient CPXV and the (D132R) OMCP CPXV infection in WT and

1 FcRL5-deficient mice demonstrated the critical importance of NKG2D blockade during WT  
2 CPXV infection, and strongly implicates OMCP blockade of NKG2D as the primary virulence  
3 effect.

4  
5 **Glycosylated OMCP does not bind FcRL5.** Compared to previous *in vitro* experiments with  
6 bacterial-derived OMCP [37-39], OMCP produced in mammalian cells would be modified by N-  
7 linked glycosylation. OMCP is glycosylated at N12, one of its two putative N-glycan sites, when  
8 produced in mammalian cells (Fig S3A). The absence of a phenotype for FcRL5 in mice led us  
9 to confirm whether mammalian-derived, glycosylated OMCP binds to FcRL5-expressing cells.  
10 To test whether glycosylation would affect OMCP receptor binding, we compared binding of  
11 bacterially-expressed or mammalian-expressed OMCP to Ba/f3 cells expressing NKG2D or  
12 FcRL5 (Fig. 5A). Regardless of source, OMCP bound to NKG2D-expressing cells. In contrast  
13 to bacterially-expressed OMCP, mammalian-expressed OMCP did not bind to FcRL5-  
14 expressing cells. To confirm whether the difference in FcRL5 binding was due to glycosylation,  
15 mammalian-expressed OMCP was treated with EndoF to remove the N-linked glycan. The  
16 deglycosylated protein gained the ability to interact with FcRL5. Next we tested the binding of  
17 mammalian-expressed OMCP to primary human PBMCs (Fig 5B). As a positive control for  
18 NKG2D binding, we included the human NKG2DL ULBP3. WT OMCP and ULBP3 stained both  
19 NK and a subset of T cells, but not B cells, consistent with NKG2D expression on these cells. In  
20 contrast, (D132R) OMCP failed to significantly stain NK and T cells, supporting that WT OMCP  
21 cell staining is due to binding NKG2D. Together the *in vivo* virulence (Fig 4) and cell binding  
22 experiments (Fig 5) demonstrate that mammalian-derived OMCP functions only as a high  
23 affinity NKG2D antagonist and is not a bona fide FcRL5 ligand. Importantly, OMCP blockade of  
24 NKG2D plays a significant role in pathogenesis in mice, and potentially an even larger role with  
25 higher affinity NKG2D orthologs, like human NKG2D.

26

1 **Structural basis for species-specific affinity.** Previously, the 14-fold higher affinity of OMCP  
2 for human vs murine NKG2D was mapped to three amino acid substitutions in the  $\beta 5'$ - $\beta 5$  loop of  
3 NKG2D, abbreviated L2 [38]. In addition to the substitutions themselves (I182V, M184I and  
4 Q185P), the position of the loop between NKG2D orthologs differs. L2 in human NKG2D is bent  
5 towards the center of the concave binding cavity compared to L2 of murine NKG2D.  
6 Superimposition of murine NKG2D onto the human NKG2D-OMCP structure reveals that the  
7 contacts between OMCP and Met184 (mNKG2D residue I200) in NKG2D<sup>B</sup> and between Met184  
8 (I200) and Glu185 (P201) in NKG2D<sup>A</sup> would be altered due to the different position of the  
9 murine  $\beta 5'$ - $\beta 5$  loop (Figure 6A-B). This alteration would disrupt contacts with three residues in  
10 OMCP H2a, three residues in H2b and Arg66 within the  $\alpha 1$  domain. Of the contact residues of  
11 L2, Met184 makes the most significant contacts in both NKG2Ds (Table 2)(Figure 6C).  
12 Critically, of the 58 NKG2D sequences available in GenBank, 54 conserve the Met184 and  
13 Glu185 found in the high affinity human NKG2D (Figure 6D).

14 Eighteen OMCP variants have been described between different CPXV and MPXV  
15 strains [51]. In this study, we have crystallized OMCP from the Brighton Red strain of CPXV  
16 which has >60% sequence identity with the highly conserved sequence of the other 17 OMCP  
17 variants, collectively termed OMCP<sub>mpx</sub>. Of the 12 OMCP contact residues observed, 9 are  
18 identical to OMCP<sub>mpx</sub>. Of the remaining contacts, all three are conservative hydrophobic  
19 substitutions (I49L, T118I and M135I) (Figure 7). OMCP<sub>mpx</sub> binds to NKG2D and the  
20 substitutions in the NKG2D contact residues are unlikely to grossly affect the affinity of  
21 OMCP<sub>mpx</sub> for NKG2D [37].

22  
23 **A novel NKG2D-binding adaptation.** Host NKG2DLs have low sequence identity but overall  
24 similar structures, with MHCI-like platform domains binding diagonally across the symmetric  
25 binding groove created by the NKG2D homodimer [13, 42, 52]. Host ligands contact one  
26 NKG2D half site with H1 and the S1-S2 loop, and contact the second NKG2D half site with H2b.

1 Despite the similar MHCI-like fold, OMCP binds the NKG2D binding groove in a novel  
2 orientation, rotating  $\sim 45^\circ$  relative to host NKG2DLs (Figure 7). Instead of using H1 and S1-S2  
3 loop like host ligands, OMCP has replaced these contacts with H2a. This rotation leads to the  
4 helices of OMCP being perpendicular to the NKG2D binding groove, instead of lying diagonally  
5 across it.

6 Two unique rearrangements of H2a and H2b make the OMCP orientation possible. The  
7  $\alpha 2$  helices of OMCP and host NKG2DLs are discontinuous, with the two shorter helices hinged  
8 relative to each other. For host ligands, the angle between H2a and H2b is  $\sim 90^\circ$ , positioning  
9 H2a away from the NKG2D interface. In contrast, OMCP has increased the hinge angle  
10 between the helices by  $\sim 20^\circ$ , leading to a  $\alpha 2$  helix that is flatter relative to the beta sheet of  
11 OMCP. The flattening of the  $\alpha 2$  helix allows H2a and H2b to closely complement the concave  
12 binding groove of the NKG2D homodimer (Figure 2B). The tight fit of the  $\alpha 2$  helix for NKG2D is  
13 reflected in the high shape complementarity (0.77) and buried surface area (2,612  $\text{\AA}^2$ ). In  
14 contrast, host NKG2DLs have shape complementarity ranging from 0.63-0.72 and buried  
15 surface areas ranging from 1,700-2,180  $\text{\AA}^2$  [44, 45, 47].

16 The second unique feature of the  $\alpha 2$  helix is the separation of H2a and H2b relative to  
17 each other. This region also contains a translation that completely separates H2a and H2b into  
18 two distinct helices. This translation is critical for NKG2D binding because it allows each helix to  
19 be directly centered on the core binding sites of each NKG2D monomer (Figure 7). This creates  
20 a symmetric binding site on OMCP that recognizes the symmetric binding groove created by the  
21 NKG2D dimer. The symmetry between OMCP and NKG2D binding is in stark contrast to the  
22 canonical binding of an asymmetric host ligand to the symmetric NKG2D binding groove [52].  
23 However, one element of asymmetry remains in the OMCP-NKG2D interaction because each  
24 NKG2D half-site recognizes an OMCP helix in a different N- to C-terminal orientation,  
25 demonstrating again the flexibility of NKG2Ds rigid adaptation recognition [42, 53].

1           The contact sites between NKG2D and host NKG2DLs are made up of two patches  
2 centered on the core binding sites of NKG2D and H1/S1-S2 loop and H2b of NKG2DLs [42]. As  
3 a result, the interface of NKG2D with NKG2DLs is discontinuous, particularly in the center of the  
4 NKG2D binding groove (Figure 7). Due to the unique orientation of OMCP, H2a and H2b make  
5 continuous contacts along the entire NKG2D binding groove (Figure 7). The sidechains of  
6 OMCP Lys126, Trp127, Glu131 and Asp132 make contacts with residues in the center of the  
7 NKG2D binding groove and bridge the core binding sites on each NKG2D monomer (Figure  
8 2B). In particular, OMCP Trp127 is directed towards the center of the NKG2D dimer and makes  
9 hydrophobic contacts with residues on both NKG2D monomers, effectively closing any gaps in  
10 the binding interface.

11  
12 **Signaling of NKG2D upon ligand engagement.** CPXV and MPXV-infected cells secrete  
13 OMCP, which can act as an NKG2D-antagonist and block *in vitro* NKG2D-mediated NK cell  
14 killing of target cells [37]. This immune evasion strategy is reminiscent of cancer induced-  
15 NKG2DL shedding. Some cancer cells proteolytically cleave NKG2DLs from the cell surface  
16 using matrix metalloproteinases (MMPs), simultaneously preventing NKG2D-bearing  
17 lymphocytes from targeting the cancer cell, as well as creating soluble NKG2DLs to inhibit  
18 NKG2D in *trans*. Cell-associated NKG2DLs trigger NKG2D effector functions (Figure 8A), while  
19 cancer-induced, soluble NKG2DLs block NKG2D function (Figure 8B). Like shed NKG2DLs,  
20 OMCP is soluble and blocks NKG2D function in *trans* [37] (Figure 8C). Unlike host NKG2DLs,  
21 OMCP binds NKG2D with a novel orientation. We therefore asked whether OMCP could serve  
22 as a NKG2D agonist in the context of the cell membrane, analogously to host NKG2D ligands.  
23 Since OMCP is a secreted protein, an artificially cell-associated OMCP was constructed by  
24 using a heterologous GPI anchor from Thy1.1 [37] (Figure 5D). To measure NKG2D-mediated  
25 cell killing, we stably transduced Ba/F3 cells with retroviral vectors expressing either the OMCP-  
26 Thy1.1 construct or host NKG2DLs. OMCP-Thy1.1-expressing target cells were killed

1 equivalently to host NKG2DL-transduced target cells, indicating that despite its altered binding  
2 orientation, cell-associated OMCP was able to activate NKG2D signaling (Figure 8E). Thus,  
3 OMCP must be secreted lest it active NKG2D-effector functions itself, despite potential loss of  
4 efficacy due to diffusion.

## 5 6 **Discussion**

7 Pathogens deploy multiple mechanisms to subvert the host immune response. We have  
8 previously reported that the poxvirus protein OMCP binds to two different murine immune  
9 receptors, NKG2D and FcRL5. Here, we demonstrate for the first time that OMCP facilitates  
10 cowpox virus virulence *in vivo* thorough antagonism of NKG2D. Surprisingly, we found no  
11 impact of FCRL5 *in vivo* during infections with OMCP-deficient CPXV or D132R CPVX  
12 (expressing OMCP with a mutation selectively abrogating binding with NKG2D). Investigations  
13 into the absence of a phenotype in the FCRL5-deficient mice revealed that mammalian-derived,  
14 glycosylated OMCP did not bind to FCRL5 in contrast to bacterially-expressed OMCP.  
15 Treatment of the mammalian-derived OMCP with EndoF removed the N-linked glycan and  
16 exposed a portion of OMCP that would not be present during *in vivo* infections. Surprisingly, this  
17 normally hidden surface of OMCP was able to interact with FcRL5-expressing cells. This  
18 observation has implications more broadly for the use of bacterially-expressed proteins in  
19 receptor-ligand studies. However, these data highlight the importance of OMCP in subverting  
20 NKG2D-mediated control of cowpox virus infection. In the absence of OMCP antagonism of  
21 NKG2D, cowpox virus was significantly attenuated. Cowpox virus inhibits the cell surface  
22 expression of MHCI to avoid recognition by effector T cells[30, 31]. The loss of MHCI  
23 expression on the cell surface induces “missing self” and enhanced recognition by NK cells. In  
24 the absence of OMCP antagonism of the activating NK cell receptor NKG2D, infected cells  
25 become more susceptible to NK cell-mediated killing.

1           While many viruses have adopted a general mechanism of NKG2D-sabotage by trying  
2 to retain multiple host-encoded NKG2D ligands within the infected cell, CPXV and MPXV take  
3 the very different approach of targeting NKG2D directly. Since NKG2D is monomorphic, this  
4 mechanism has the significant advantage of requiring a single protein to prevent NKG2D  
5 recognition of the infected cell. The large number of sequence-divergent host NKG2DLs and  
6 their associated polymorphisms are thought to be driven by selection from pathogen-encoded  
7 NKG2DL antagonists [14]. Likewise, viral NKG2L antagonists are under selective pressure from  
8 the diverse host NKG2DLs in a continual cycle of adaptation. Due to the need to recognize  
9 multiple NKG2DLs, NKG2D has a limited mutational space to adapt. The limited ability of  
10 NKG2D to mutate is yet another advantage of OMCP directly targeting NKG2D, instead of  
11 NKG2DLs.

12           Similarly to OMCP, some cancer cells shed host NKG2DLs to create their own soluble  
13 NKG2D antagonists. However, this strategy has the additional benefit of removing host  
14 NKG2DL from the surface of cancer cells. In contrast, CPXV and MPXV lack a known  
15 mechanism of blocking host NKG2DL surface expression. Secreted OMCP must then be able  
16 to compete efficiently against the high local concentration of multiple host NKG2DLs on the  
17 infected cell, as well as against diffusion away from the infected cell. One possible way to  
18 increase OMCP's ability to compete with host ligands would be to increase the avidity of OMCP  
19 by having multiple NKG2D-binding domains. However, a multimeric OMCP could crosslink  
20 NKG2D and potentially trigger NKG2D-mediated killing. Therefore, secreted OMCP must be  
21 monomeric to prevent aberrant NKG2D signaling. Thus to compensate for these deficiencies,  
22 OMCP must have the highest possible affinity to effectively compete against cell-associated  
23 host NKG2DLs [37, 38]. The half-life of ligand-receptor interactions correlate well with  
24 physiological competitiveness [54]. OMCP binds human and murine NKG2D with half-lives of  
25 348 and 54 seconds, respectively, compared to half-lives of 1.5-18 seconds for most NKG2DLs  
26 [38, 45, 55]. Indeed, the increased half-life for NKG2D allows OMCP to effectively antagonize



1 NKG2D-mediated immunity in our murine infection models despite the lower affinity of the  
2 murine NKG2D receptor for OMCP compared to human NKG2D receptor. CPXV infections in  
3 primates or rodents that express the higher affinity NKG2D receptor would likely be protected  
4 from NKG2D-mediated immunity by OMCP to a greater degree.

5 To understand the molecular basis for the long half-life of OMCP for NKG2D, we  
6 previously determined the structure of OMCP alone, and here, we report the structure of OMCP  
7 bound to NKG2D. The structure of OMCP alone was grossly similar to that of host NKG2D  
8 ligands, containing an atypical MHCI-like platform domain. Host NKG2D ligands bind with the  
9 helices of their platform domains oriented diagonally within the symmetric binding groove of  
10 NKG2D. Thus it was expected that OMCP was a viral mimic of host NKG2D ligands and would  
11 interact with NKG2D analogously.

12 The structure of OMCP-NKG2D instead revealed a novel orientation for an NKG2D  
13 ligand in the NKG2D binding groove. Alterations within the  $\alpha 2$  domain helix allow OMCP to  
14 arrange its helices perpendicularly within the binding groove. This reorientation places the H2a  
15 and H2b helices directly in contact with the core binding sites of NKG2D and also forms the  
16 largest and most continuous binding interface with NKG2D. Because the forces (hydrogen  
17 bonds, van der Waals, hydrophobic interactions) that mediate protein-protein interactions are  
18 individually weak, a large, continuous interface with high shape complementary allows for a  
19 cumulatively strong interaction between proteins. This change in the binding orientation of  
20 OMCP reveals how the MHCI-like platform used by host ligands can be adapted by a pathogen  
21 to enhance NKG2D binding.

22 Since host NKG2DLs and OMCP have a similar MHCI-like platform, it is reasonable to  
23 wonder why no host ligand has evolved an analogous high-affinity interaction with NKG2D. One  
24 likely reason is that the host immune response must be carefully calibrated to balance the need  
25 for protection against the threat of autoimmunity. Since the expression of NKG2DLs on the cell  
26 surface signals for effector functions, even a small amount of high affinity host ligand on the cell

1 surface could trigger an immune response, and the resulting tissue damage could be  
2 deleterious for the host. Indeed, NKG2D-expressing cells and/or aberrant expression of host  
3 NKG2DLs have been implicated in diabetes, celiac disease and rheumatoid arthritis [56-59].  
4 Viruses are not constrained by autoimmune selective pressures. Therefore, CPXV and MPXV  
5 were free to evolve a viral NKG2DL with the highest possible affinity to maximize immune  
6 evasion potential.

7         Interestingly, OMCP triggers NKG2D signaling when attached to a target cell membrane,  
8 despite the novel orientation of OMCP relative to host NKG2DLs. The interaction of host  
9 NKG2DLs with the dimeric NKG2D bears broad structural similarity to the interaction between  
10 MHC molecules with their cognate T cell receptors (TCRs). In both cases, the NKG2DL/MHC  
11 lies diagonally across the surface created by the dimeric NKG2D/TCR. However, there are  
12 several examples of MHC-TCR complexes that, like OMCP-NKG2D, interact with  
13 unconventional orientations [60-64]. Several of these complexes involved autoimmune MHC-  
14 TCR complexes that were tilted or rotated outside of the normal range for MHC-TCR complexes  
15 [60, 64]. While these receptors could induce TCR signaling at high MHC concentrations, they  
16 failed to assemble characteristic immunological synapses [65]. A striking example of  
17 unconventional binding was found when an *in vitro* peptide library-MHC-TCR (H2-L<sup>d</sup>-42F3)  
18 screen produced a p3A1-H2-L<sup>d</sup>-42F3 complex with an interface rotated ~40° relative to other  
19 H2-L<sup>d</sup>-42F3 complexes. This rotation places the TCR nearly parallel with the MHC peptide-  
20 binding groove and shifted the interface center almost entirely on one of the MHC  $\alpha$  helices - an  
21 orientation strikingly similar to the interface of OMCP-NKG2D [64]. Interestingly, the p3A1-H2-  
22 L<sup>d</sup>-42F3 complex failed to induce TCR signaling [64]. Thus, unlike OMCP/NKG2D, the  
23 orientation of MHC relative to TCR is an important factor for signaling.

24         OMCP-NKG2D and p3A1-H2-L<sup>d</sup>-42F3 have opposite signaling outcomes, despite having  
25 very similar orientations. TCR signaling requires co-receptor binding to either the  $\alpha 2/\beta 2$  or  $\alpha 3$   
26 domains of MHCII or MHCI, respectively. The failure of p3A1-H2-L<sup>d</sup>-42F3 to signal, and of other

1 unconventional MHC-TCR complexes to form true immunological synapses, is potentially due to  
2 the inability of co-receptors to form correct quaternary structures for signaling [63, 64, 66].  
3 Signaling by NKG2D is not known to require co-receptor stimulation and the majority of  
4 NKG2DLs lack the co-receptor binding  $\alpha 2/\beta 2$  or  $\alpha 3$  domains of true MHC molecules. This  
5 difference in co-receptor dependency likely explains why OMCP (when attached via GPI  
6 anchor) is still competent to stimulate NKG2D-signaling compared to MHC-TCR complexes with  
7 unconventional binding orientations. Further, it suggests that clustering of NKG2D on the cell  
8 surface is the major determinant of NKG2D-mediated activation.

9

## 10 **Materials and Methods**

### 11 **Cell lines and mice.**

12 The generation of Ba/F3 transductants expressing NKG2D, FcRL5, RAE1 $\delta$ , MULT1, and  
13 OMCP-Thy1.1 was previously described [37, 67]. C57BL/6 (B6) mice were obtained from the  
14 National Cancer Institute (Charles River, MA). NKG2D-deficient mice on a B6 background were  
15 a kind gift from Bojan Polic (University of Rijeka, Croatia) [68], and FcRL5-deficient mice on a  
16 B6 background were obtained from Riccardo Dalla Favera (Columbia University). Mice were  
17 maintained under specific pathogen-free conditions and used between 8 and 12 weeks of age.  
18 Female mice utilized in survival studies were observed daily after infection for 28 days and  
19 moribund mice were euthanized per institutional guidelines.

20

### 21 **Ethics Statement.**

22 All experiments were conducted in accordance with institutional guidelines for animal care and  
23 use based on the Guide for the Care and Use of Laboratory Animals of the National Institutes of  
24 Health. The protocol was approved by the Animal Studies Committee at Washington University  
25 (#20110104). Human PBMC were collected under IRB approved protocol #201110275 at

1 Washington University in St Louis. Informed consent was obtained from all volunteers donating  
2 blood.

3

#### 4 **CPXV and infection of mice.**

5 Brighton Red strain CPXV was obtained from the ATCC and propagated in BS-C-1 cells. Virus  
6 was purified from infected BS-C-1 cell lysates by centrifugation through a 36% sucrose gradient.  
7 The titer of the viral stock was determined using a standard plaque assay on BS-C-1 cells [69,  
8 70]. Intraperitoneal (i.p.) infections were done at a dose of  $2 \times 10^6$  pfu CPXV/mouse unless  
9 otherwise indicated. For intranasal infections, mice were first anesthetized i.p. with  
10 ketamine/xylazine short acting sedative. Mice were infected with the appropriate inoculum of  
11 virus in a 50 $\mu$ L volume intranasally. All i.n. infections were done at a dose of  $2.5 \times 10^4$  pfu  
12 CPXV/mouse unless otherwise indicated.

13

#### 14 **Generation of recombinant cowpox viruses.**

15 Recombinant virus lacking expression of OMCP ( $\Delta$ V018) and its revertant were produced by  
16 transient dominant selection [71, 72]. A PCR product encoding the VACV p7.5 5' UTR and  
17 promoter was amplified and spliced to another PCR product encoding the *E. coli gpt* sequence.  
18 The final product was cloned into plasmid pUC19 to create pUC19 p7.5 *gpt*. OMCP was then  
19 amplified in two fragments in order to insert two tandem early termination codons. This product  
20 was cloned into pUC19 7.5 *gpt* to create pUC19 p7.5 *gpt* OMCPSTOP. The revertant plasmid  
21 pUC19 p7.5 *gpt* OMCP was generated by excising the OMCPSTOP sequence and replacing it  
22 with wild-type OMCP. OMCP D132R mutant CPXV was generated in a similar manner with  
23 primers to insert a point mutation at D132. The mutated D132R construct was also spliced to *E.*  
24 *coli gpt* and cloned for transient dominant selection.

25

1 Confluent CV-1 cells were then infected with CPXV (for CPXV  $\Delta$ V018 or D132R generation) or  
2 CPXV  $\Delta$ V018 (for revertant generation) at an MOI of 0.5. Two hours post-infection, the cells  
3 were transfected with pUC19 p7.5 *gpt* OMCPSTOP for CPXV  $\Delta$ V018, pUC19 p7.5 *gpt* OMCP-  
4 D132R for D132R generation, or pUC19 p7.5 *gpt* OMCP for revertant generation using  
5 Lipofectamine2000. The infected/transfected cells were lysed after 48 hours, and *gpt*+ viruses  
6 were selected by infecting confluent B-SC-1 cells with the transfected virus stock in *gpt*  
7 selection medium (DMEM, 2% FCS, 25  $\mu$ g/mL mycophenolic acid, 250  $\mu$ g/mL xanthine, and 15  
8  $\mu$ g/mL hypoxanthine). *Gpt*+ viral plaques underwent two further rounds of selection in *gpt*  
9 selection media and two subsequent rounds of purification in non-selective media. Finally,  
10 plaques were tested for their ability to grow in both selective and non-selective media. Plaques  
11 that grew only in non-selective media (indicating loss of the *gpt* marker) were picked and  
12 underwent a total of five plaque purifications. Virus stocks were subsequently propagated in B-  
13 SC-1 cells and titered following standard protocols using B-SC-1 cells [70].

14

15 **Identification of NKG2D-binding null mutant D132R.** A high throughput *in vitro* selection  
16 approach based on combinatorial cell surface display was utilized to identify NKG2D-binding  
17 null mutants. The sequence of OMCP was globally mutagenized using error-prone PCR, and  
18 the mutated amplicons were spliced to a signal-less Thy1.1 cDNA via overlap extension PCR.  
19 This library of mutated OMCPs fused to unmutated Thy1.1 was cloned into the pMXs-IRES-  
20 EGFP retroviral transfer vector (kind gift of Toshio Kitamura, University of Tokyo) to generate a  
21 molecular library for transduction into Ba/F3 cells. The transductants were then sorted for green  
22 fluorescence and anti-Thy1.1 expression to yield a cellular library whose members all had  
23 surface expression of OMCP, filtering out mutations giving frameshifts, premature stop codons,  
24 and folding-incompetent OMCP. This OMCP library was sorted for NKG2D binding using  
25 NKG2D-tetramers. Sorted cells were cloned by limiting dilution and analyzed. The retroviral  
26 cassettes of cells lacking or having reduced NKG2D-binding activity were amplified and

1 sequenced. Utilizing this approach, we identified Asp132 as a critical residue for NKG2D  
2 binding.

3  
4 **Protein expression and purification.** OMCP<sub>BR</sub> and human NKG2D expression constructs  
5 were previously described [38]. The (D132R) OMCP<sub>BR</sub> protein was prepared identically to WT  
6 OMCP<sub>BR</sub>. (23D/95D) OMCP-NKG2D complex was reconstituted by oxidative co-refolding from  
7 purified inclusion bodies, as described previously [38]. Refolded protein was slowly diluted 10-  
8 fold with water and captured on a 5 ml HiTrap Q HP column (GE Healthcare) using a Profinia  
9 instrument (Bio-Rad). The captured protein was washed with 50 mM Tris, pH 8.5, 20 mM NaCl  
10 and bulk eluted with 50 mM Tris, pH 8.5, 250 mM NaCl. The eluted protein was then  
11 concentrated and further purified by gel filtration chromatography on a Superdex S75 column  
12 (16/60; Amersham Biosciences). Fractions containing mono-dispersed OMCP-NKG2D complex  
13 (~50 KDa) were pooled and buffer exchanged into 25mM Ammonium acetate pH 7.4.

14 Mammalian-derived proteins were expressed by transient transfection of HEK293F cells  
15 (Life Technologies) using PEI. The culture medium was collected 3 days and 6 days after  
16 transfection, and then purified by standard Ni-NTA chromatography in accordance with the  
17 manufacturer's protocol (Gold Biotechnology) and were subsequently buffer exchanged into  
18 phosphate-buffered saline (PBS). Pentamerized proteins were made by fusing the target protein  
19 with a C-terminal cartilage oligomeric matrix protein (COMP) domain [73].

20  
21 **Crystallization, data collection and processing.** Native protein crystals were grown by  
22 hanging drop vapor diffusion at 20°C by streak seeding into a well solution containing 15% PEG  
23 3350, 0.2M MgCl<sub>2</sub>, 0.1M Bis-Tris pH 6.75. Crystals were cryoprotected with well solution  
24 containing 15% glycerol before flash freezing directly in a liquid nitrogen bath. Diffraction data  
25 were collected at the Advanced Light Source synchrotron (beamline 4.2.2). Native (23D/95D)  
26 OMCP-hNKG2D crystal diffraction data were collected at 100 K and at a wavelength of 1.00004

1 Å. Additional diffraction data statistics are summarized in Table 1. Data processing with  
2 HKL2000 [74] showed the crystals belonged to the primitive monoclinic space group  $P2_1$  (space  
3 group #4). The asymmetric unit of the crystal contained two copies of the (23D/95D) OMCP-  
4 hNKG2D complex.

5  
6 **Model building and refinement.** The structures of human NKG2D (1MPU)[49] and OMCP  
7 (4FFE)[38] were used as search models for molecular replacement through Phenix [75].  
8 Iterative refinement and manual rebuilding were performed using Phenix and Coot [76],  
9 respectively. Both 2Fo-Fc and Fo-Fc maps were used for manual building and to place solvent  
10 molecules. The final model yielded an  $R_{\text{work}}$  of 16.6% and  $R_{\text{free}}$  of 21.4%, with 4% of all  
11 reflections set aside for free R factor cross-validation. Progress in refinement was also  
12 measured using the MOLPROBITY webserver [77]. The final Ramachandran statistics for the  
13 model were 98% favored and 0% outliers. Additional refinement statistics are summarized in  
14 Table 1. Images of structures were produced using the program PyMol [78].

15  
16 **Structure analysis.** Analysis of the contact residues, buried surface area and shape  
17 complementarity of the OMCP-NKG2D interface were carried out using the programs Ligplot+  
18 [79], PISA [80] and SC [81]. Structural programs as compiled by the SBGrid consortium [82].  
19 Analysis of NKG2D conservation was performed using the ConSurf server [83-86]. GenBank  
20 numbers for species used in Consurf analysis are: Humans (30749494), Borean orangutan  
21 (21902299), Chimpanzee (57113989), Gibbon (332232684), Macaque (355785888), Green  
22 Monkey (635063485), Common marmoset (380848799), Mouse (148667521), Brown rat  
23 (149049263), Guinea Pig (348569092), Ground squirrel (532114387), Deer mouse  
24 (589967905), Naked mole rat (512868733), Prairie vole (532053033), European Shrew  
25 (505834608), Star-nosed mole (507978716), Chinese hamster (537136230), and Cat  
26 (410963826).

1

## 2 **Atomic coordinates**

3 The atomic coordinates (accession code 4PDC) have been deposited in the Protein Data Bank,  
4 Research Collaboratory for Structural Bioinformatics (Rutgers University, New Brunswick, NJ)

5

6 ***In vitro* NK cell killing assays.** Splenocytes from C57BL/6 mice were preactivated with 200  
7 U/ml IL-2 for 24 hours and used as cytotoxic effectors against stably transduced Ba/F3 cell lines  
8 in standard killing assays. Target cells were carboxyfluorescein succinimidyl ester (CFSE)  
9 labeled and co-incubated with activated splenocytes at 37°C, 5% CO<sub>2</sub> for 4 hours at  
10 effector:target ratios of 10:1, 20:1, and 40:1. Killing percentage was determined by incorporation  
11 of the dead cell exclusion dye 7-amino-actinomycin D (7AAD) in the CFSE+ target population as  
12 assessed by flow cytometry. Percent specific lysis was calculated using the formula  
13  $[(\text{experimental dead \%} - \text{background dead \%}) / (\text{maximum release dead \%} - \text{background dead$   
14  $\%)] \times 100$ . Single cell suspensions of splenocytes used in killing assays were generated using  
15 standard protocols[87].

16

## 17 **Antibodies, and Flow cytometry.**

18 Recombinant OMCP, D132R OMCP, and West Nile Virus glycoprotein domain III (DIII) were  
19 produced and biotinylated as previously reported [37, 88]. APC labeled tetramers were made  
20 by incubating biotinylated OMCP protein with APC-streptavidin in a 4:1 molar ratio for 10 min at  
21 room temperature. APC eFlour 780 anti-CD3 (145-2C11) and eFlour 450 anti-CD19 (1D3) were  
22 purchased from eBioscience (San Diego, CA). FITC CD19 (1D3) and PE anti-NK1.1 (PK136  
23 were from BD Biosciences (San Jose, CA). FITC anti-CD5 (53-7.3) was from Biolegend (San  
24 Diego, CA). Antibodies and staining of human PBMCs were performed as previously reported  
25 [39]. Single cell suspensions of splenocytes and isolation of peritoneal cells and Ficoll  
26 purification of human PBMCs were performed using standard protocols [87, 89]. To block



1 nonspecific binding of antibodies to FcRs, murine cells were incubated in 2.4G2 (anti-FcγRII/III)  
2 supernatants (hybridoma from ATCC) prior to staining with labeled Abs. Data was collected on a  
3 FACScan flow cytometer (BD Pharmingen) with DXP multicolor upgrade (Cytex Development,  
4 Fremont, CA) and FlowJo CE software (TreeStar, Ashland, OR) or FACSCalibur flow cytometer  
5 (BD Biosciences) with CellQuest collection software (BD Biosciences). Data analysis was  
6 performed using FlowJo software (TreeStar).

7

### 8 **Plaque assay.**

9 Tissues harvested from mice were weighed and collected in tubes containing 1mL of DMEM  
10 and stored at -80°C until processing. Frozen organs were homogenized using glass dounce  
11 homogenizers and collected in 1mL of DMEM. The tissue homogenate was serially diluted in  
12 D2.5 media (DMEM, 2.5% FBS, 1% L-glutamine, 1% penicillin-streptomycin, 1% non-essential  
13 amino acids) and used in standard plaque assays on BS-C-1 cells [69]. Each organ was titered  
14 on  $5 \times 10^5$  BS-C-1 cells plated in wells of 6 well plates in duplicate. Infected cell cultures were  
15 maintained in D2.5 media at 37°C, 5% CO<sub>2</sub> for 48 hours. Cells were stained at 48 hours post  
16 infection using a crystal violet solution and plaques were counted. Viral titers were calculated  
17 from a minimum of 3 dilutions done in duplicate.

18

### 19 **Statistical analysis.**

20 Data analysis was done with Microsoft Excel and GraphPad Prism (GraphPad Software, La  
21 Jolla, CA). Unless otherwise noted, unpaired, two-tailed t tests were used to determine  
22 statistically significant differences. Error bars in the figures represent SDs from the mean value.  
23 The Log-rank (Mantel-Cox) test was used in the comparison of all Kaplan Meier survival curves.

24

### 25 **Acknowledgements**

- 1 E.L., X.W., C.N., and D.H.F. were supported in part by NIH/NIAID R01 AI019687, U19
- 2 AI109948 and NIAID contracts HHSN272200700058C & HHSN272201200026C. M.M.S, T.L.G,
- 3 D.L, and A.R.F were supported in part by NIH/NIAID R01AI073552. A.S.K. supported by NIH
- 4 PO1 AI116501. We thank Helen M. Lazear for help with illustrations

## 1 References

- 2 1. Hansen TH, Bouvier M. MHC class I antigen presentation: learning from viral evasion  
3 strategies. *Nature reviews Immunology*. 2009;9(7):503-13. Epub 2009/06/06. doi:  
4 10.1038/nri2575. PubMed PMID: 19498380.
- 5 2. Griffin BD, Verweij MC, Wiertz EJ. Herpesviruses and immunity: the art of evasion. *Vet*  
6 *Microbiol*. 2010;143(1):89-100. Epub 2010/03/23. doi: 10.1016/j.vetmic.2010.02.017. PubMed  
7 PMID: 20303681.
- 8 3. Karre K, Ljunggren HG, Piontek G, Kiessling R. Selective rejection of H-2-deficient  
9 lymphoma variants suggests alternative immune defence strategy. *Nature*. 1986;319(6055):675-  
10 8. Epub 1986/02/20. doi: 10.1038/319675a0. PubMed PMID: 3951539.
- 11 4. Orange JS, Fassett MS, Koopman LA, Boyson JE, Strominger JL. Viral evasion of natural  
12 killer cells. *Nature immunology*. 2002;3(11):1006-12. Epub 2002/10/31. doi: 10.1038/ni1102-  
13 1006. PubMed PMID: 12407408.
- 14 5. Lisnic VJ, Krmpotic A, Jonjic S. Modulation of natural killer cell activity by viruses. *Current*  
15 *opinion in microbiology*. 2010;13(4):530-9. Epub 2010/06/19. doi: 10.1016/j.mib.2010.05.011.  
16 PubMed PMID: 20558100; PubMed Central PMCID: PMC2920364.
- 17 6. Finton KA, Strong RK. Structural insights into activation of antiviral NK cell responses.  
18 *Immunological reviews*. 2012;250(1):239-57. Epub 2012/10/11. doi: 10.1111/j.1600-  
19 065X.2012.01168.x. PubMed PMID: 23046134; PubMed Central PMCID: PMC3471384.
- 20 7. Li Y, Mariuzza RA. Structural Basis for Recognition of Cellular and Viral Ligands by NK  
21 Cell Receptors. *Front Immunol*. 2014;5:123. Epub 2014/04/12. doi: 10.3389/fimmu.2014.00123.  
22 PubMed PMID: 24723923; PubMed Central PMCID: PMC3972465.
- 23 8. Raulet DH. Roles of the NKG2D immunoreceptor and its ligands. *Nature reviews*  
24 *Immunology*. 2003;3(10):781-90. Epub 2003/10/03. doi: 10.1038/nri1199. PubMed PMID:  
25 14523385.
- 26 9. Draghi M, Pashine A, Sanjanwala B, Gendzekhadze K, Cantoni C, Cosman D, et al.  
27 NKp46 and NKG2D recognition of infected dendritic cells is necessary for NK cell activation in the  
28 human response to influenza infection. *J Immunol*. 2007;178(5):2688-98. Epub 2007/02/22.  
29 PubMed PMID: 17312110.
- 30 10. Pappworth IY, Wang EC, Rowe M. The switch from latent to productive infection in  
31 epstein-barr virus-infected B cells is associated with sensitization to NK cell killing. *Journal of*  
32 *virology*. 2007;81(2):474-82. Epub 2006/11/03. doi: 10.1128/JVI.01777-06. PubMed PMID:  
33 17079298; PubMed Central PMCID: PMC1797427.
- 34 11. Welte SA, Sinzger C, Lutz SZ, Singh-Jasuja H, Sampaio KL, Eknigk U, et al. Selective  
35 intracellular retention of virally induced NKG2D ligands by the human cytomegalovirus UL16  
36 glycoprotein. *European journal of immunology*. 2003;33(1):194-203. Epub 2003/02/21. doi:  
37 10.1002/immu.200390022. PubMed PMID: 12594848.
- 38 12. Ward J, Bonaparte M, Sacks J, Guterman J, Fogli M, Mavilio D, et al. HIV modulates the  
39 expression of ligands important in triggering natural killer cell cytotoxic responses on infected  
40 primary T-cell blasts. *Blood*. 2007;110(4):1207-14. Epub 2007/05/22. doi: 10.1182/blood-2006-  
41 06-028175. PubMed PMID: 17513617; PubMed Central PMCID: PMC1939902.
- 42 13. Obeidy P, Sharland AF. NKG2D and its ligands. *Int J Biochem Cell Biol*.  
43 2009;41(12):2364-7. Epub 2009/07/28. doi: 10.1016/j.biocel.2009.07.005. PubMed PMID:  
44 19631280.
- 45 14. Eagle RA, Trowsdale J. Promiscuity and the single receptor: NKG2D. *Nature reviews*  
46 *Immunology*. 2007;7(9):737-44. Epub 2007/08/04. doi: 10.1038/nri2144. PubMed PMID:  
47 17673918.
- 48 15. Lodoen M, Ogasawara K, Hamerman JA, Arase H, Houchins JP, Mocarski ES, et al.  
49 NKG2D-mediated natural killer cell protection against cytomegalovirus is impaired by viral gp40  
50 modulation of retinoic acid early inducible 1 gene molecules. *The Journal of experimental*  
51 *medicine*. 2003;197(10):1245-53. Epub 2003/05/21. doi: 10.1084/jem.20021973. PubMed PMID:  
52 12756263; PubMed Central PMCID: PMC2193789.
- 53 16. Lodoen MB, Abenes G, Umamoto S, Houchins JP, Liu F, Lanier LL. The cytomegalovirus  
54 m155 gene product subverts natural killer cell antiviral protection by disruption of H60-NKG2D  
55 interactions. *The Journal of experimental medicine*. 2004;200(8):1075-81. Epub 2004/10/13. doi:  
56 10.1084/jem.20040583. PubMed PMID: 15477345; PubMed Central PMCID: PMC2211837.

- 1 17. Krmptotic A, Hasan M, Loewendorf A, Saulig T, Halenius A, Lenac T, et al. NK cell  
2 activation through the NKG2D ligand MULT-1 is selectively prevented by the glycoprotein  
3 encoded by mouse cytomegalovirus gene m145. *The Journal of experimental medicine*.  
4 2005;201(2):211-20. Epub 2005/01/12. doi: 10.1084/jem.20041617. PubMed PMID: 15642742;  
5 PubMed Central PMCID: PMC2212792.
- 6 18. Lenac T, Budt M, Arapovic J, Hasan M, Zimmermann A, Simic H, et al. The herpesviral  
7 Fc receptor fcr-1 down-regulates the NKG2D ligands MULT-1 and H60. *The Journal of*  
8 *experimental medicine*. 2006;203(8):1843-50. Epub 2006/07/13. doi: 10.1084/jem.20060514.  
9 PubMed PMID: 16831899; PubMed Central PMCID: PMC2118374.
- 10 19. Cosman D, Mullberg J, Sutherland CL, Chin W, Armitage R, Fanslow W, et al. ULBPs,  
11 novel MHC class I-related molecules, bind to CMV glycoprotein UL16 and stimulate NK  
12 cytotoxicity through the NKG2D receptor. *Immunity*. 2001;14(2):123-33. Epub 2001/03/10.  
13 PubMed PMID: 11239445.
- 14 20. Chalupny NJ, Rein-Weston A, Dosch S, Cosman D. Down-regulation of the NKG2D  
15 ligand MICA by the human cytomegalovirus glycoprotein UL142. *Biochem Biophys Res Commun*.  
16 2006;346(1):175-81. Epub 2006/06/06. doi: 10.1016/j.bbrc.2006.05.092. PubMed PMID:  
17 16750166.
- 18 21. Thomas M, Boname JM, Field S, Nejentsev S, Salio M, Cerundolo V, et al. Down-  
19 regulation of NKG2D and NKp80 ligands by Kaposi's sarcoma-associated herpesvirus K5  
20 protects against NK cell cytotoxicity. *Proceedings of the National Academy of Sciences of the*  
21 *United States of America*. 2008;105(5):1656-61. Epub 2008/01/31. doi:  
22 10.1073/pnas.0707883105. PubMed PMID: 18230726; PubMed Central PMCID: PMC2234200.
- 23 22. Cerboni C, Neri F, Casartelli N, Zingoni A, Cosman D, Rossi P, et al. Human  
24 immunodeficiency virus 1 Nef protein downmodulates the ligands of the activating receptor  
25 NKG2D and inhibits natural killer cell-mediated cytotoxicity. *The Journal of general virology*.  
26 2007;88(Pt 1):242-50. Epub 2006/12/16. doi: 10.1099/vir.0.82125-0. PubMed PMID: 17170457.
- 27 23. Wen C, He X, Ma H, Hou N, Wei C, Song T, et al. Hepatitis C virus infection  
28 downregulates the ligands of the activating receptor NKG2D. *Cellular & molecular immunology*.  
29 2008;5(6):475-8. Epub 2009/01/03. doi: 10.1038/cmi.2008.60. PubMed PMID: 19118515.
- 30 24. Stern-Ginossar N, Elefant N, Zimmermann A, Wolf DG, Saleh N, Biton M, et al. Host  
31 immune system gene targeting by a viral miRNA. *Science*. 2007;317(5836):376-81. Epub  
32 2007/07/21. doi: 10.1126/science.1140956. PubMed PMID: 17641203.
- 33 25. Nachmani D, Stern-Ginossar N, Sarid R, Mandelboim O. Diverse herpesvirus microRNAs  
34 target the stress-induced immune ligand MICB to escape recognition by natural killer cells. *Cell*  
35 *host & microbe*. 2009;5(4):376-85. Epub 2009/04/22. doi: 10.1016/j.chom.2009.03.003. PubMed  
36 PMID: 19380116.
- 37 26. Bauman Y, Nachmani D, Vitenshtein A, Tsukerman P, Drayman N, Stern-Ginossar N, et  
38 al. An identical miRNA of the human JC and BK polyoma viruses targets the stress-induced  
39 ligand ULBP3 to escape immune elimination. *Cell host & microbe*. 2011;9(2):93-102. Epub  
40 2011/02/16. doi: 10.1016/j.chom.2011.01.008. PubMed PMID: 21320692.
- 41 27. Gainey MD, Rivenbark JG, Cho H, Yang L, Yokoyama WM. Viral MHC class I inhibition  
42 evades CD8+ T-cell effector responses in vivo but not CD8+ T-cell priming. *Proceedings of the*  
43 *National Academy of Sciences of the United States of America*. 2012;109(47):E3260-7. Epub  
44 2012/11/01. doi: 10.1073/pnas.1217111109. PubMed PMID: 23112205; PubMed Central PMCID:  
45 PMC3511129.
- 46 28. Byun M, Verweij MC, Pickup DJ, Wiertz EJ, Hansen TH, Yokoyama WM. Two  
47 mechanistically distinct immune evasion proteins of cowpox virus combine to avoid antiviral CD8  
48 T cells. *Cell host & microbe*. 2009;6(5):422-32. Epub 2009/11/18. doi:  
49 10.1016/j.chom.2009.09.012. PubMed PMID: 19917497; PubMed Central PMCID: PMC2791900.
- 50 29. Byun M, Wang X, Pak M, Hansen TH, Yokoyama WM. Cowpox virus exploits the  
51 endoplasmic reticulum retention pathway to inhibit MHC class I transport to the cell surface. *Cell*  
52 *host & microbe*. 2007;2(5):306-15. Epub 2007/11/17. doi: 10.1016/j.chom.2007.09.002. PubMed  
53 PMID: 18005752.
- 54 30. McCoy WHt, Wang X, Yokoyama WM, Hansen TH, Fremont DH. Cowpox virus employs  
55 a two-pronged strategy to outflank MHCI antigen presentation. *Molecular immunology*. 2013.  
56 Epub 2013/01/15. doi: 10.1016/j.molimm.2012.11.011. PubMed PMID: 23312338.

- 1 31. McCoy WHt, Wang X, Yokoyama WM, Hansen TH, Fremont DH. Structural mechanism  
2 of ER retrieval of MHC class I by cowpox. *PLoS biology*. 2012;10(11):e1001432. Epub  
3 2012/12/05. doi: 10.1371/journal.pbio.1001432. PubMed PMID: 23209377; PubMed Central  
4 PMCID: PMC3507924.
- 5 32. Alzhanova D, Edwards DM, Hammarlund E, Scholz IG, Horst D, Wagner MJ, et al.  
6 Cowpox virus inhibits the transporter associated with antigen processing to evade T cell  
7 recognition. *Cell host & microbe*. 2009;6(5):433-45. Epub 2009/11/18. doi:  
8 10.1016/j.chom.2009.09.013. PubMed PMID: 19917498; PubMed Central PMCID: PMC2791678.
- 9 33. Dasgupta A, Hammarlund E, Slifka MK, Fruh K. Cowpox virus evades CTL recognition  
10 and inhibits the intracellular transport of MHC class I molecules. *J Immunol*. 2007;178(3):1654-  
11 61. Epub 2007/01/24. PubMed PMID: 17237415.
- 12 34. Luteijn RD, Hoelen H, Kruse E, van Leeuwen WF, Grootens J, Horst D, et al. Cowpox  
13 Virus Protein CPXV012 Eludes CTLs by Blocking ATP Binding to TAP. *J Immunol*.  
14 2014;193(4):1578-89. Epub 2014/07/16. doi: 10.4049/jimmunol.1400964. PubMed PMID:  
15 25024387.
- 16 35. Fang M, Lanier LL, Sigal LJ. A role for NKG2D in NK cell-mediated resistance to poxvirus  
17 disease. *PLoS pathogens*. 2008;4(2):e30. Epub 2008/02/13. doi: 10.1371/journal.ppat.0040030.  
18 PubMed PMID: 18266471; PubMed Central PMCID: PMC2233669.
- 19 36. Song H, Josleyn N, Janosko K, Skinner J, Reeves RK, Cohen M, et al. Monkeypox virus  
20 infection of rhesus macaques induces massive expansion of natural killer cells but suppresses  
21 natural killer cell functions. *PloS one*. 2013;8(10):e77804. Epub 2013/10/23. doi:  
22 10.1371/journal.pone.0077804. PubMed PMID: 24147080; PubMed Central PMCID:  
23 PMC3798392.
- 24 37. Campbell JA, Trossman DS, Yokoyama WM, Carayannopoulos LN. Zoonotic  
25 orthopoxviruses encode a high-affinity antagonist of NKG2D. *J Exp Med*. 2007;204(6):1311-7.  
26 doi: 10.1084/jem.20062026. PubMed PMID: 17548517.
- 27 38. Lazear E, Peterson LW, Nelson CA, Fremont DH. Crystal structure of the cowpox virus-  
28 encoded NKG2D ligand OMCP. *Journal of virology*. 2013;87(2):840-50. Epub 2012/11/02. doi:  
29 10.1128/JVI.01948-12. PubMed PMID: 23115291; PubMed Central PMCID: PMC3554055.
- 30 39. Campbell JA, Davis RS, Lilly LM, Fremont DH, French AR, Carayannopoulos LN. Cutting  
31 edge: FcR-like 5 on innate B cells is targeted by a poxvirus MHC class I-like immunoevasin. *J*  
32 *Immunol*. 2010;185(1):28-32. Epub 2010/06/04. doi: 10.4049/jimmunol.1000240. PubMed PMID:  
33 20519648.
- 34 40. Carayannopoulos LN, Naidenko OV, Kinder J, Ho EL, Fremont DH, Yokoyama WM.  
35 Ligands for murine NKG2D display heterogeneous binding behavior. *European journal of*  
36 *immunology*. 2002;32(3):597-605. Epub 2002/02/22. doi: 10.1002/1521-  
37 4141(200203)32:3<597::AID-IMMU597>3.0.CO;2-E. PubMed PMID: 11857333.
- 38 41. Mistry AR, O'Callaghan CA. Regulation of ligands for the activating receptor NKG2D.  
39 *Immunology*. 2007;121(4):439-47. Epub 2007/07/07. doi: 10.1111/j.1365-2567.2007.02652.x.  
40 PubMed PMID: 17614877; PubMed Central PMCID: PMC2265965.
- 41 42. Strong RK, McFarland BJ. NKG2D and Related Immunoreceptors. *Adv Protein Chem*.  
42 2004;68:281-312. Epub 2004/10/27. doi: 10.1016/S0065-3233(04)68008-9. PubMed PMID:  
43 15500864.
- 44 43. Deng L, Mariuzza RA. Structural basis for recognition of MHC and MHC-like ligands by  
45 natural killer cell receptors. *Semin Immunol*. 2006;18(3):159-66. Epub 2006/06/02. doi:  
46 10.1016/j.smim.2006.03.004. PubMed PMID: 16737824; PubMed Central PMCID: PMC2519613.
- 47 44. Li P, McDermott G, Strong RK. Crystal structures of RAE-1beta and its complex with the  
48 activating immunoreceptor NKG2D. *Immunity*. 2002;16(1):77-86. Epub 2002/02/05. PubMed  
49 PMID: 11825567.
- 50 45. Li P, Morris DL, Willcox BE, Steinle A, Spies T, Strong RK. Complex structure of the  
51 activating immunoreceptor NKG2D and its MHC class I-like ligand MICA. *Nature immunology*.  
52 2001;2(5):443-51. Epub 2001/04/27. doi: 10.1038/87757. PubMed PMID: 11323699.
- 53 46. Li P, Willie ST, Bauer S, Morris DL, Spies T, Strong RK. Crystal structure of the MHC  
54 class I homolog MIC-A, a gammadelta T cell ligand. *Immunity*. 1999;10(5):577-84. Epub  
55 1999/06/15. PubMed PMID: 10367903.

- 1 47. Radaev S, Rostro B, Brooks AG, Colonna M, Sun PD. Conformational plasticity revealed  
2 by the cocrystal structure of NKG2D and its class I MHC-like ligand ULBP3. *Immunity*.  
3 2001;15(6):1039-49. Epub 2002/01/05. PubMed PMID: 11754823.
- 4 48. Adams EJ, Luoma AM. The adaptable major histocompatibility complex (MHC) fold:  
5 structure and function of nonclassical and MHC class I-like molecules. *Annu Rev Immunol*.  
6 2013;31:529-61. Epub 2013/01/10. doi: 10.1146/annurev-immunol-032712-095912. PubMed  
7 PMID: 23298204.
- 8 49. McFarland BJ, Kortemme T, Yu SF, Baker D, Strong RK. Symmetry recognizing  
9 asymmetry: analysis of the interactions between the C-type lectin-like immunoreceptor NKG2D  
10 and MHC class I-like ligands. *Structure*. 2003;11(4):411-22. Epub 2003/04/08. PubMed PMID:  
11 12679019.
- 12 50. Chapman JL, Nichols DK, Martinez MJ, Raymond JW. Animal models of orthopoxvirus  
13 infection. *Veterinary pathology*. 2010;47(5):852-70. doi: 10.1177/0300985810378649. PubMed  
14 PMID: 20682806.
- 15 51. Lefkowitz EJ, Upton C, Changayil SS, Buck C, Traktman P, Buller RM. Poxvirus  
16 Bioinformatics Resource Center: a comprehensive Poxviridae informational and analytical  
17 resource. *Nucleic acids research*. 2005;33(Database issue):D311-6. Epub 2004/12/21. doi:  
18 10.1093/nar/gki110. PubMed PMID: 15608205; PubMed Central PMCID: PMC540064.
- 19 52. Strong RK. Asymmetric ligand recognition by the activating natural killer cell receptor  
20 NKG2D, a symmetric homodimer. *Molecular immunology*. 2002;38(14):1029-37. Epub  
21 2002/04/17. PubMed PMID: 11955595.
- 22 53. Radaev S, Sun PD. Structure and function of natural killer cell surface receptors. *Annu*  
23 *Rev Biophys Biomol Struct*. 2003;32:93-114. Epub 2002/12/10. doi:  
24 10.1146/annurev.biophys.32.110601.142347. PubMed PMID: 12471063.
- 25 54. Copeland RA, Pompliano DL, Meek TD. Drug-target residence time and its implications  
26 for lead optimization. *Nat Rev Drug Discov*. 2006;5(9):730-9. Epub 2006/08/05. doi:  
27 10.1038/nrd2082. PubMed PMID: 16888652.
- 28 55. O'Callaghan CA, Cerwenka A, Willcox BE, Lanier LL, Bjorkman PJ. Molecular  
29 competition for NKG2D: H60 and RAE1 compete unequally for NKG2D with dominance of H60.  
30 *Immunity*. 2001;15(2):201-11. Epub 2001/08/25. PubMed PMID: 11520456.
- 31 56. Groh V, Bruhl A, El-Gabalawy H, Nelson JL, Spies T. Stimulation of T cell autoreactivity  
32 by anomalous expression of NKG2D and its MIC ligands in rheumatoid arthritis. *Proceedings of*  
33 *the National Academy of Sciences of the United States of America*. 2003;100(16):9452-7. Epub  
34 2003/07/25. doi: 10.1073/pnas.1632807100. PubMed PMID: 12878725; PubMed Central PMCID:  
35 PMC170939.
- 36 57. Hue S, Mention JJ, Monteiro RC, Zhang S, Cellier C, Schmitz J, et al. A direct role for  
37 NKG2D/MICA interaction in villous atrophy during celiac disease. *Immunity*. 2004;21(3):367-77.  
38 Epub 2004/09/11. doi: 10.1016/j.immuni.2004.06.018. PubMed PMID: 15357948.
- 39 58. Meresse B, Chen Z, Ciszewski C, Tretiakova M, Bhagat G, Krausz TN, et al. Coordinated  
40 induction by IL15 of a TCR-independent NKG2D signaling pathway converts CTL into  
41 lymphokine-activated killer cells in celiac disease. *Immunity*. 2004;21(3):357-66. Epub  
42 2004/09/11. doi: 10.1016/j.immuni.2004.06.020. PubMed PMID: 15357947.
- 43 59. Ogasawara K, Hamerman JA, Hsin H, Chikuma S, Bour-Jordan H, Chen T, et al.  
44 Impairment of NK cell function by NKG2D modulation in NOD mice. *Immunity*. 2003;18(1):41-51.  
45 Epub 2003/01/18. PubMed PMID: 12530974.
- 46 60. Hahn M, Nicholson MJ, Pyrdol J, Wucherpfennig KW. Unconventional topology of self  
47 peptide-major histocompatibility complex binding by a human autoimmune T cell receptor. *Nature*  
48 *immunology*. 2005;6(5):490-6. Epub 2005/04/12. doi: 10.1038/ni1187. PubMed PMID: 15821740;  
49 PubMed Central PMCID: PMC3415330.
- 50 61. Sethi DK, Schubert DA, Anders AK, Heroux A, Bonsor DA, Thomas CP, et al. A highly  
51 tilted binding mode by a self-reactive T cell receptor results in altered engagement of peptide and  
52 MHC. *The Journal of experimental medicine*. 2011;208(1):91-102. Epub 2011/01/05. doi:  
53 10.1084/jem.20100725. PubMed PMID: 21199956; PubMed Central PMCID: PMC3023130.
- 54 62. Wucherpfennig KW, Call MJ, Deng L, Mariuzza R. Structural alterations in peptide-MHC  
55 recognition by self-reactive T cell receptors. *Curr Opin Immunol*. 2009;21(6):590-5. Epub

- 1 2009/08/25. doi: 10.1016/j.coi.2009.07.008. PubMed PMID: 19699075; PubMed Central PMCID:  
2 PMC2787854.
- 3 63. Yin Y, Li Y, Mariuzza RA. Structural basis for self-recognition by autoimmune T-cell  
4 receptors. *Immunological reviews*. 2012;250(1):32-48. Epub 2012/10/11. doi: 10.1111/imr.12002.  
5 PubMed PMID: 23046121.
- 6 64. Adams JJ, Narayanan S, Liu B, Birnbaum ME, Kruse AC, Bowerman NA, et al. T cell  
7 receptor signaling is limited by docking geometry to peptide-major histocompatibility complex.  
8 *Immunity*. 2011;35(5):681-93. Epub 2011/11/22. doi: 10.1016/j.immuni.2011.09.013. PubMed  
9 PMID: 22101157; PubMed Central PMCID: PMC3253265.
- 10 65. Schubert DA, Gordo S, Sabatino JJ, Jr., Vardhana S, Gagnon E, Sethi DK, et al. Self-  
11 reactive human CD4 T cell clones form unusual immunological synapses. *The Journal of*  
12 *experimental medicine*. 2012;209(2):335-52. Epub 2012/02/09. doi: 10.1084/jem.20111485.  
13 PubMed PMID: 22312112; PubMed Central PMCID: PMC3280872.
- 14 66. Li Y, Yin Y, Mariuzza RA. Structural and biophysical insights into the role of CD4 and  
15 CD8 in T cell activation. *Front Immunol*. 2013;4:206. Epub 2013/07/26. doi:  
16 10.3389/fimmu.2013.00206. PubMed PMID: 23885256; PubMed Central PMCID: PMC3717711.
- 17 67. Campbell JA, Davis RS, Lilly LM, Fremont DH, French AR, Carayannopoulos LN. Cutting  
18 Edge: FcR-Like 5 on Innate B Cells Is Targeted by a Poxvirus MHC Class I-Like Immunoevasin.  
19 *The Journal of Immunology*. 2010;185(1):28-32. doi: 10.4049/jimmunol.1000240.
- 20 68. Zafirova B, Mandarić S, Antulov R, Krmpotić A, Jonsson H, Yokoyama WM, et al. Altered  
21 NK cell development and enhanced NK cell-mediated resistance to mouse cytomegalovirus in  
22 NKG2D-deficient mice. *Immunity*. 2009;31(2):270-82. doi: 10.1016/j.immuni.2009.06.017.  
23 PubMed PMID: 19631564.
- 24 69. Earl PL, Cooper N, Wyatt LS, Moss B, Carroll MW. Preparation of cell cultures and  
25 vaccinia virus stocks. *Current protocols in protein science / editorial board, John E Coligan [et al].*  
26 2001;Chapter 5:Unit5.12. doi: 10.1002/0471140864.ps0512s13. PubMed PMID: 18429178.
- 27 70. Earl PL, Cooper N, Wyatt LS, Moss B, Carroll MW. Preparation of cell cultures and  
28 vaccinia virus stocks. *Current protocols in protein science / editorial board, John E Coligan [et al].*  
29 2001;Chapter 5:Unit5 12. Epub 2008/04/23. doi: 10.1002/0471140864.ps0512s13. PubMed  
30 PMID: 18429178.
- 31 71. Falkner FG, Moss B. Transient dominant selection of recombinant vaccinia viruses.  
32 *Journal of virology*. 1990;64(6):3108-11. Epub 1990/06/01. PubMed PMID: 2159565; PubMed  
33 Central PMCID: PMC249504.
- 34 72. Kato SE, Greco FA, Damaso CR, Condit RC, Moussatche N. An alternative genetic  
35 method to test essential vaccinia virus early genes. *Journal of virological methods*.  
36 2004;115(1):31-40. Epub 2003/12/06. PubMed PMID: 14656458.
- 37 73. Tomschy A, Fauser C, Landwehr R, Engel J. Homophilic adhesion of E-cadherin occurs  
38 by a co-operative two-step interaction of N-terminal domains. *EMBO J*. 1996;15(14):3507-14.  
39 Epub 1996/07/15. PubMed PMID: 8670853; PubMed Central PMCID: PMCPMC451947.
- 40 74. Otwinowski Z, Minor W. Processing of X-ray diffraction data collected in oscillation mode.  
41 *Macromolecular Crystallography, Pt A*. 1997;276:307-26. PubMed PMID: ISI:A1997BH42P00020.
- 42 75. Adams PD, Grosse-Kunstleve RW, Hung LW, Ioerger TR, McCoy AJ, Moriarty NW, et al.  
43 PHENIX: building new software for automated crystallographic structure determination. *Acta*  
44 *crystallographica Section D, Biological crystallography*. 2002;58(Pt 11):1948-54. Epub  
45 2002/10/24. PubMed PMID: 12393927.
- 46 76. Emsley P, Cowtan K. Coot: model-building tools for molecular graphics. *Acta*  
47 *crystallographica Section D, Biological crystallography*. 2004;60(Pt 12 Pt 1):2126-32. Epub  
48 2004/12/02. doi: 10.1107/S0907444904019158. PubMed PMID: 15572765.
- 49 77. Chen VB, Arendall WB, 3rd, Headd JJ, Keedy DA, Immormino RM, Kapral GJ, et al.  
50 MolProbity: all-atom structure validation for macromolecular crystallography. *Acta*  
51 *crystallographica Section D, Biological crystallography*. 2010;66(Pt 1):12-21. Epub 2010/01/09.  
52 doi: 10.1107/S0907444909042073. PubMed PMID: 20057044; PubMed Central PMCID:  
53 PMC2803126.
- 54 78. Schrodinger, LLC. The PyMOL Molecular Graphics System, Version 1.3r1. 2010.

- 1 79. Laskowski RA, Swindells MB. LigPlot+: multiple ligand-protein interaction diagrams for  
2 drug discovery. *Journal of chemical information and modeling*. 2011;51(10):2778-86. Epub  
3 2011/09/17. doi: 10.1021/ci200227u. PubMed PMID: 21919503.
- 4 80. Krissinel E, Henrick K. Inference of macromolecular assemblies from crystalline state.  
5 *Journal of molecular biology*. 2007;372(3):774-97. Epub 2007/08/08. doi:  
6 10.1016/j.jmb.2007.05.022. PubMed PMID: 17681537.
- 7 81. Lawrence MC, Colman PM. Shape complementarity at protein/protein interfaces. *Journal*  
8 *of molecular biology*. 1993;234(4):946-50. Epub 1993/12/20. doi: 10.1006/jmbi.1993.1648.  
9 PubMed PMID: 8263940.
- 10 82. Morin A, Eisenbraun B, Key J, Sanschagrín PC, Timony MA, Ottaviano M, et al.  
11 Collaboration gets the most out of software. *eLife*. 2013;2:e01456. Epub 2013/09/17. doi:  
12 10.7554/eLife.01456. PubMed PMID: 24040512; PubMed Central PMCID: PMC3771563.
- 13 83. Ashkenazy H, Erez E, Martz E, Pupko T, Ben-Tal N. ConSurf 2010: calculating  
14 evolutionary conservation in sequence and structure of proteins and nucleic acids. *Nucleic acids*  
15 *research*. 2010;38(Web Server issue):W529-33. Epub 2010/05/19. doi: 10.1093/nar/gkq399.  
16 PubMed PMID: 20478830; PubMed Central PMCID: PMC2896094.
- 17 84. Landau M, Mayrose I, Rosenberg Y, Glaser F, Martz E, Pupko T, et al. ConSurf 2005: the  
18 projection of evolutionary conservation scores of residues on protein structures. *Nucleic acids*  
19 *research*. 2005;33(Web Server issue):W299-302. Epub 2005/06/28. doi: 10.1093/nar/gki370.  
20 PubMed PMID: 15980475; PubMed Central PMCID: PMC1160131.
- 21 85. Glaser F, Pupko T, Paz I, Bell RE, Bechor-Shental D, Martz E, et al. ConSurf:  
22 identification of functional regions in proteins by surface-mapping of phylogenetic information.  
23 *Bioinformatics*. 2003;19(1):163-4. Epub 2002/12/25. PubMed PMID: 12499312.
- 24 86. Celniker G, Nimrod G, Ashkenazy H, Glaser F, Martz E, Mayrose I, et al. ConSurf: Using  
25 Evolutionary Data to Raise Testable Hypotheses about Protein Function. *Isr J Chem*. 2013;53(3-  
26 4):199-206. doi: Doi 10.1002/ijch.201200096. PubMed PMID: ISI:000317859800010.
- 27 87. Dokun AO, Kim S, Smith HR, Kang HS, Chu DT, Yokoyama WM. Specific and  
28 nonspecific NK cell activation during virus infection. *Nat Immunol*. 2001;2(10):951-6. doi:  
29 10.1038/ni714. PubMed PMID: 11550009.
- 30 88. Nybakken GE, Oliphant T, Johnson S, Burke S, Diamond MS, Fremont DH. Structural  
31 basis of West Nile virus neutralization by a therapeutic antibody. *Nature*. 2005;437(7059):764-9.  
32 Epub 2005/09/30. doi: nature03956 [pii]  
33 10.1038/nature03956. PubMed PMID: 16193056.
- 34 89. Zhang X, Goncalves R, Mosser DM. The isolation and characterization of murine  
35 macrophages. *Curr Protoc Immunol*. 2008;Chapter 14:Unit 14.1. doi:  
36 10.1002/0471142735.im1401s83. PubMed PMID: 19016445.
- 37 90. Stewart DE, Sarkar A, Wampler JE. Occurrence and role of cis peptide bonds in protein  
38 structures. *Journal of molecular biology*. 1990;214(1):253-60. Epub 1990/07/05. doi:  
39 10.1016/0022-2836(90)90159-J. PubMed PMID: 2370664.
- 40 91. Craveur P, Joseph AP, Poulain P, de Brevern AG, Rebehmed J. Cis-trans isomerization  
41 of omega dihedrals in proteins. *Amino Acids*. 2013;45(2):279-89. Epub 2013/06/04. doi:  
42 10.1007/s00726-013-1511-3. PubMed PMID: 23728840.

43

44

45

46

47



1 **Figure Legends**

2

3 **Figure 1. Cowpox virus lacking OMCP is significantly attenuated *in vivo*.** WT  
4 CPXV **(A)** is more virulent than  $\Delta V018$  CPXV **(B)**, as evidenced by increased lethality at  
5 all tested doses. The revertant CPXV control **(C)** phenocopies WT CPXV as is  
6 expected. 8-12 week old female WT B6 mice were infected with  $2 \times 10^6$  (solid line),  $1 \times 10^6$   
7 (dashed line), or  $0.6 \times 10^6$  (dotted line) of the indicated CPXV strain, and survival was  
8 assessed daily for 28 days. Data are aggregated from two-seven independent  
9 experiments with 5-10 mice per group.

10

11 **Figure 2. The structure of OMCP in complex with NKG2D.** **(A)** OMCP bound to  
12 NKG2D. OMCP is colored magenta and the protomers of NKG2D are colored cyan (“A”)  
13 and yellow (“B”). NKG2D<sup>A</sup> makes contacts primarily with the H2a helix and NKG2D<sup>B</sup>  
14 with H2b. Mutations introduced to facilitate alternate crystal packing are shown in red.  
15 The S193-S194 bond is shown as a ball on each NKG2D protomer. The asparagines of  
16 putative hNKG2D glycosylation sites are shown in orange. The asparagine of the  
17 confirmed N-glycan site of OMCP is shown green (data not shown) **(B)** View of the  
18 interface between OMCP-NKG2D. The  $\alpha 2$  domain of OMCP is shown in the front with  
19 the  $\alpha 1$  domain behind. OMCP and NKG2D are shown with cartoon representations for  
20 the main chain, with the side chains of contact residues shown as sticks. Hydrogen  
21 bonds and salt bridges are indicated with green dotted lines.

22

23 **Figure 3. The interface of OMCP and NKG2D.** **(A)** The local environment of the  
24 OMCP-NKG2D binding interface surrounding the D132R residue. The D132R mutation  
25 ablates OMCP-NKG2D binding. **(B)** APC labeled OMCP tetramers (solid line) were  
26 used to stain splenic NK cells (NK1.1+, CD3-) and peritoneal B1-a B cells (CD19+,

1 CD5+), Staining with APC labeled WNV DIII tetramer control shown in gray histograms.

2 Representative results from three independent experiments.

3

4 **Figure 4. NKG2D mediates all of the virulence of OMCP during intranasal CPXV**

5 **infection.** WT CPXV (solid line),  $\Delta$ V018 CPXV (dashed line) and D132R OMCP CPXV

6 (dotted line) infected via the intranasal route differentially influence survival in **(A)** WT

7 B6, **(B)** NKG2D-deficient, and **(C)** FcRL5-deficient mice. Kaplan-Meier analysis shows

8 survival of female mice following intranasal infection with  $2.5 \times 10^4$  pfu of the designated

9 CPXV strain. The data are aggregated from two to four independent experiments. The

10 Log-rank (Mantel-Cox) test was used in the comparison of all Kaplan Meier survival

11 curves. NS not significant, \*\* $p < 0.01$  \*\*\* $p < 0.001$

12

13 **Figure 5. Glycosylated OMCP binds to NKG2D only.** **(A)** Sorted Ba/Fc cells

14 transduced (EGFP positive) with NKG2D or FcRL5 were stained with biotinylated

15 monomeric OMCPs or with antibodies to NKG2D or FcRL5. A representative experiment

16 is shown. **(B)** Pentamers of OMCP, (D132R) OMCP, or ULBP3 were incubated with

17 ficoll-purified human PBMCs. PBMCs were stained with antibodies to CD56, CD19,

18 CD3, and CD16. NK (CD56+, CD3-), T (CD3+), and B (CD19+, CD3-) cells were then

19 assessed by flow cytometry for protein binding. Representative results from four

20 independent experiments.

21

22 **Figure 6. Differences in the  $\beta 5'$ - $\beta 5$  loop (L2) of human and murine NKG2D.** **(A-B)**

23 Superimposition of mNKG2D (grey) (PDB ID: 1HQ8) with the structure of OMCP-

24 hNKG2D (yellow and cyan). Core binding residues Y152 (Y168) and Y199 (Y215) are

25 positionally conserved, while core binding residue M184 (I200) is not. **(C)** Surface

26 representation of OMCP (magenta) interacting with the  $\beta 5'$ - $\beta 5$  loop. **(D)** Conservation of

1 M184 and Q185. Only the NKG2D of mice, rats, guinea pigs, and flying foxes (not  
2 shown) differ. Conservation score is as computed by the ConSurf server.

3

4 **Figure 7. A novel NKG2D binding adaptation.** Surface representation of NKG2D and  
5 surface and cartoon representations of OMCP, MICA and ULBP3. Buried surface areas  
6 for NKG2D<sup>A</sup> and NKG2D<sup>B</sup> are indicated in cyan and yellow, respectively. Buried surface  
7 area by NKG2D is indicated for OMCP (magenta), MICA (green), and ULBP3 (orange).  
8 The core binding residues of NKG2D and NKG2D-binding elements of NKG2DLs are  
9 indicated. Alignment by secondary structure of NKG2DLs (PDB ID: OMCP (4FFE),  
10 MICA (1HYR), MICB (1JE6), ULBP3 (1KCG) and RAE-1 $\beta$  (1JSK)). Contact residues are  
11 indicated for OMCP (magenta), MICA (green), ULBP3 (orange) and RAE-1 $\beta$  (bold and  
12 italics). Secondary structure elements are noted above the sequence (arrow for beta  
13 sheets, cylinders for alpha helices). Predicted glycan sites are highlighted in black.

14

15 **Figure 8. Activation of NK cells by cell-associated OMCP.** Model depicting NKG2D  
16 interaction with (A) host, (B) cancer-induced, (C) viral, or (D) chimeric ligands. Binding  
17 interactions that lead to NKG2D-mediated signaling are indicated by DAP10 tyrosine  
18 phosphorylation (red filled circles). (E) IL-2-activated splenocytes were used as  
19 cytotoxic effectors against stably transduced Ba/F3 cell lines. Splenocytes were  
20 activated with 200 U/ml of IL-2 for 24 hours. Labeled target cells were co-incubated with  
21 activated splenocytes for 4 hours at effector:target ratios of 10:1, 20:1, and 40:1. Killing  
22 was measured by incorporation of 7AAD by CFSE-labeled target cells using flow  
23 cytometry. Representative data from five independent experiments is shown

24

25 **Figure S1.  $\Delta$ V018 virus and D132R virus do not have a growth defect *in vitro*.**

26 Multi-step growth curves for WT CPXV,  $\Delta$ V018, D132R, and revertant viruses show that

1 all four cowpox virus strains have similar replication kinetics in a multi-step growth curve.  
2 B-SC-1 cells were infected at an MOI of 0.01 with the indicated viruses. Infected cells  
3 were harvested at the indicated time points and freeze-thawed three times. Lysates  
4 were titered by plaque assay on B-SC-1 monolayers. Results are representative of three  
5 experiments done in duplicate.

6

7 **Figure S2. Electron density supporting a *cis* peptide conformation.** Stereo view of  
8 the  $\beta 5$ - $\beta 6$  loop of hNKG2D. Residues 193-Ala-Ser-Ser-Phe-Lys-197 is displayed for the  
9 OMCP-hNKG2D structure (yellow) and the structure of hNKG2D alone (grey). The 2Fo-  
10 Fc map for OMCP-hNKG2D is displayed at  $2\sigma$ . *Cis* conformations are underrepresented  
11 in crystal structures and are often under reported due to resolution limits and  
12 assumptions made during structure refinement [90, 91].

13

14 **Figure S3. Glycosylation of mammalian-expressed OMCP.** OMCP has two putative  
15 N-linked glycosylation sites, N12 and N88 **(A)** WT, glycosylated OMCP migrates slowly  
16 as a diffuse band. OMCP mutated at either N12 or N12/N88 migrate quickly as sharp  
17 bands. Mutation of N88 alone does not effect OMCP migration. **(B)** N-linked glycans  
18 were completely removed from 1 ug of OMCP by incubation with 10U Endo-F in 50mM  
19 sodium phosphate (pH7.5) at 37C for 16h.

20

21

| <b>Table 1: Data collection and refinement statistics<sup>a</sup></b> |                                 |
|-----------------------------------------------------------------------|---------------------------------|
|                                                                       | <u>OMCP<sub>BR</sub>-hNKG2D</u> |
| <b>Data collection</b>                                                |                                 |
| Space group                                                           | P2 <sub>1</sub>                 |
| Cell dimensions                                                       |                                 |
| a, b, c (Å)                                                           | 43.3, 101.1, 91.4               |
| $\alpha\beta\gamma$ (°)                                               | 90.0, 91.6, 90.0                |
| Resolution (Å)                                                        | 50-2.0 (2.07-2.00)              |
| $R_{\text{sym}}$                                                      | 11.8 (48.5)                     |
| $I / \sigma$                                                          | 14.5 (3.8)                      |

|                   |               |
|-------------------|---------------|
| Completeness (%)  | 93.5 (91.5)   |
| Redundancy        | 6.2 (5.3)     |
| <b>Refinement</b> |               |
| Resolution (Å)    | 44-2.0        |
| Total reflections | 309693        |
| Unique reflection | 50139         |
| $R_{work}$        | 16.6% (21.0%) |
| $R_{free}$        | 21.4% (29.5%) |
| Wilson B-factor   | 21.62         |
| Protein residues  | 791           |
| Water molecules   | 524           |
| R.M.S. deviations |               |
| Bond lengths (Å)  | 0.003         |
| Bond angles (°)   | 0.79          |

1 <sup>a</sup> As defined by PHENIX [75]

2

3

4

5

6

7

**Table 2: Interface contacts between NKG2D and OMCP**

| <b>NKG2D-A</b> | <b>OMCP</b> | <b>Bond type</b> |
|----------------|-------------|------------------|
| Lys150         | Asp132      | Salt bridge      |
| Lys150         | Trp127      | H bond           |
| Lys150         | Trp127      | Φ (3)            |
| Ser151         | Lys126      | H bond           |
| Ser151         | Trp127      | Φ (1)            |
| Tyr152         | Phe122      | H bond           |
| Tyr152         | Phe122      | Φ (9)            |
| Tyr152         | Lys126      | Φ (5)            |
| Met184         | Thr118      | H bond           |
| Met184         | Thr119      | Φ (1)            |
| Met184         | Phe122      | Φ (5)            |
| Gln185         | Arg66       | Φ (1)            |
| Leu191         | Phe122      | Φ (1)            |
| Tyr199         | Phe122      | Φ (4)            |
| Glu201         | Arg66       | Salt bridge      |
| Thr205         | Arg66       | H bond           |
| <b>NKG2D-B</b> | <b>OMCP</b> | <b>Bond type</b> |

|        |        |             |
|--------|--------|-------------|
| Leu148 | Trp127 | Φ (1)       |
| Ser151 | Glu131 | H bond      |
| Tyr152 | Asp132 | H bond      |
| Tyr152 | Glu131 | Φ (3)       |
| Tyr152 | Met135 | Φ (5)       |
| Ile182 | Ile49  | Φ (2)       |
| Glu183 | Arg142 | Salt bridge |
| Met184 | Met135 | Φ (1)       |
| Met184 | Arg138 | Φ (2)       |
| Met184 | Arg142 | H bond      |
| Lys186 | Arg142 | Φ (1)       |
| Leu191 | Met135 | Φ (1)       |
| Glu201 | Arg138 | Salt bridge |

1  
2  
3  
4  
5  
6  
7  
8

Hydrogen bonds (H bonds), salt bridges and carbon-to-carbon hydrophobic interactions (Φ) are shown for each contact residue. The number of hydrophobic interactions between contact residues is designated in parenthesis.

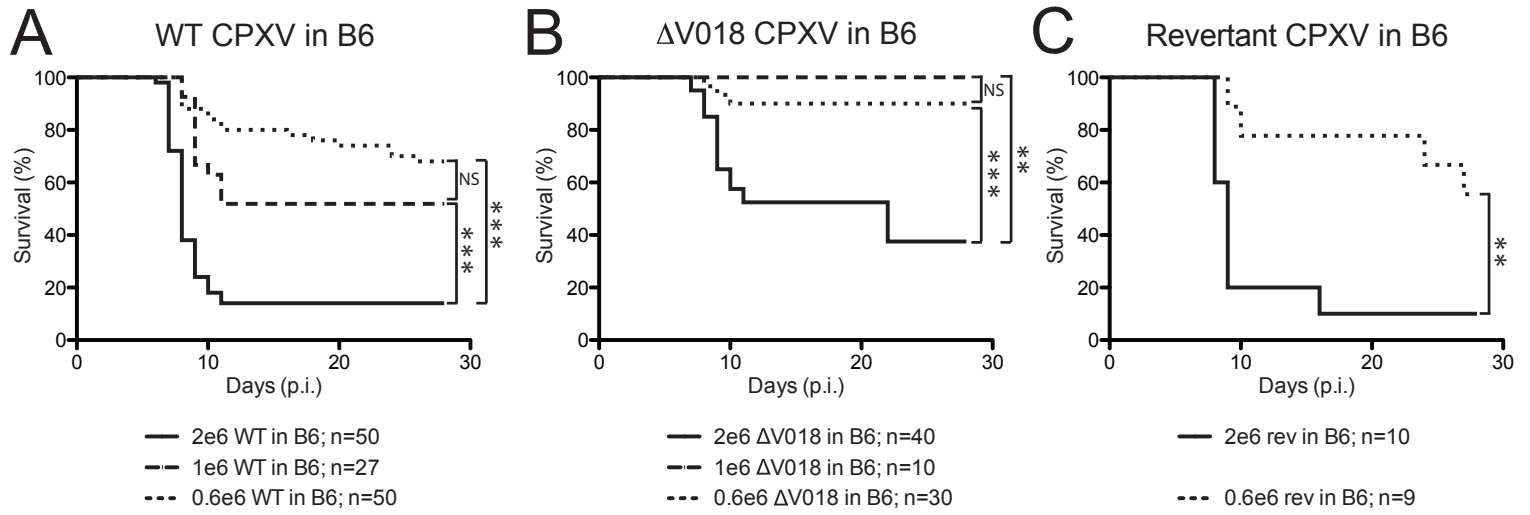

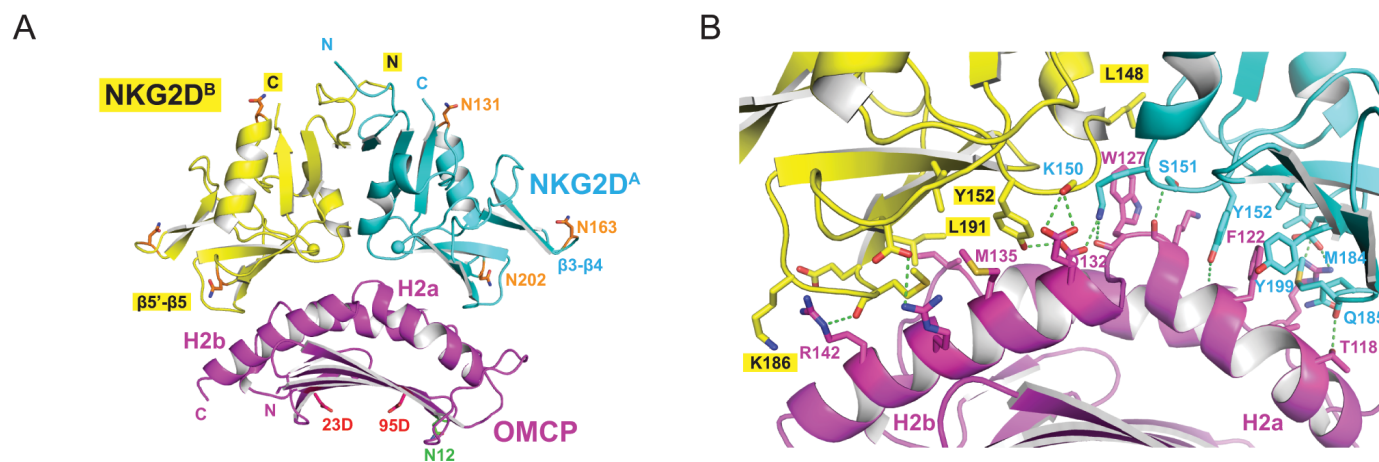



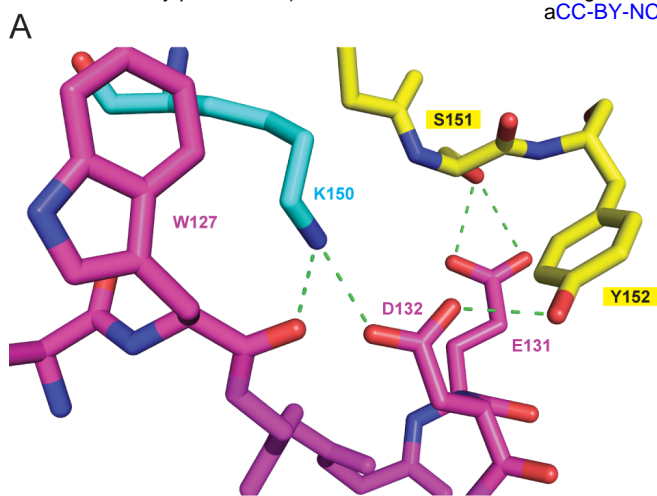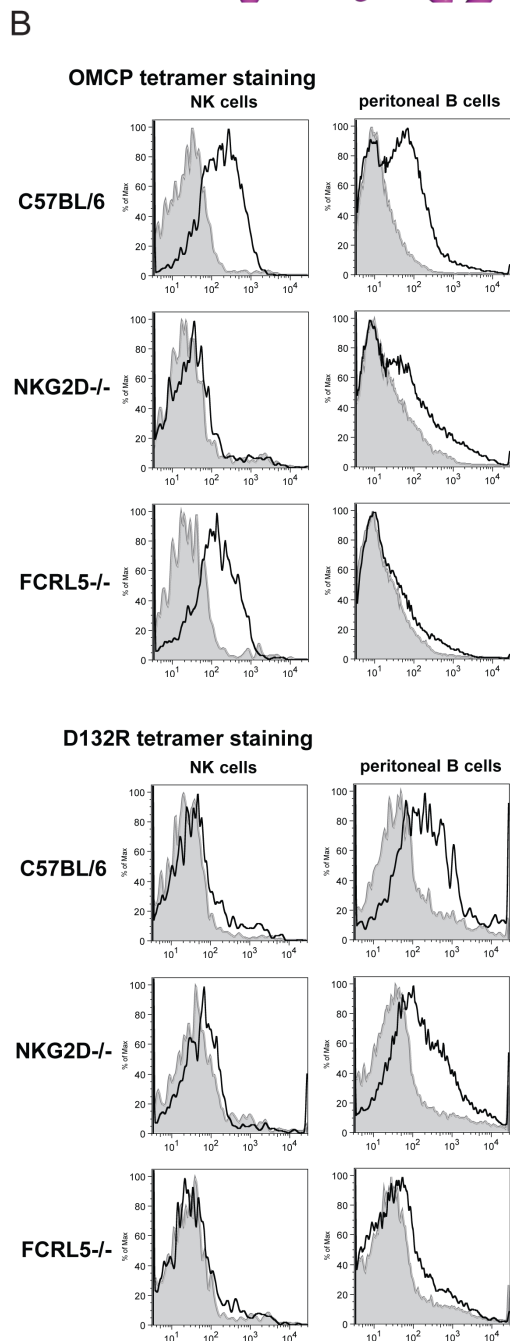

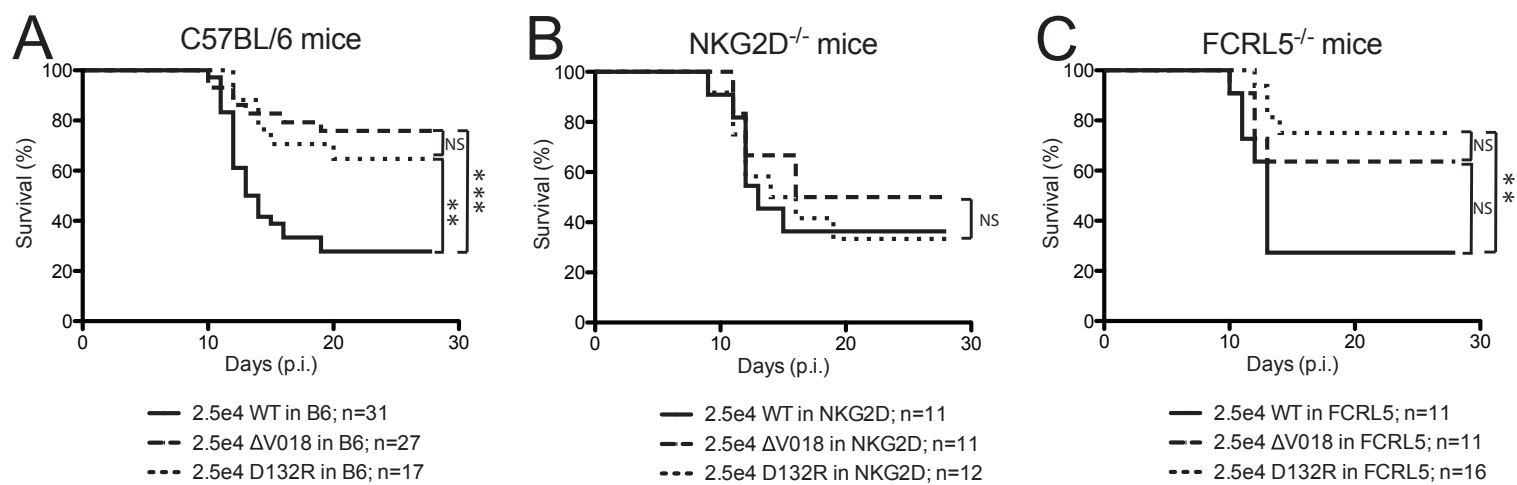

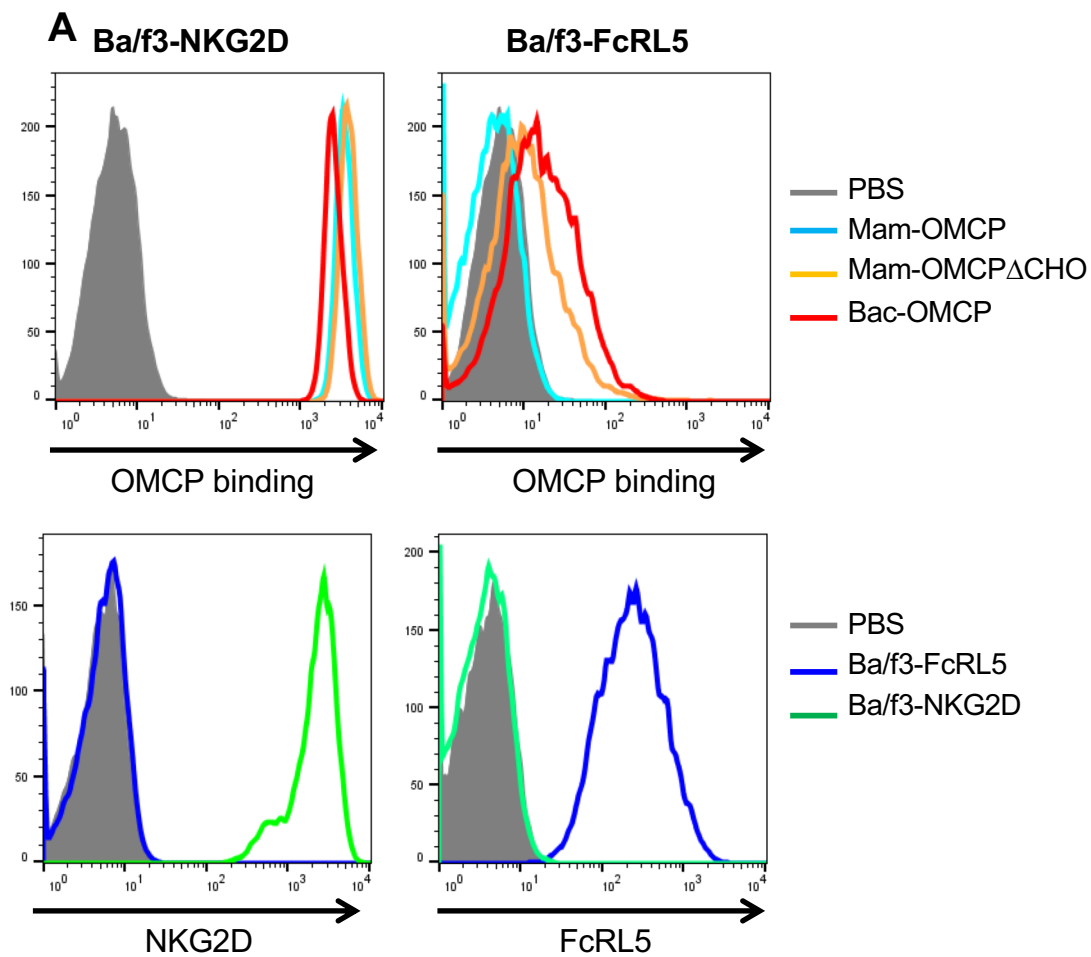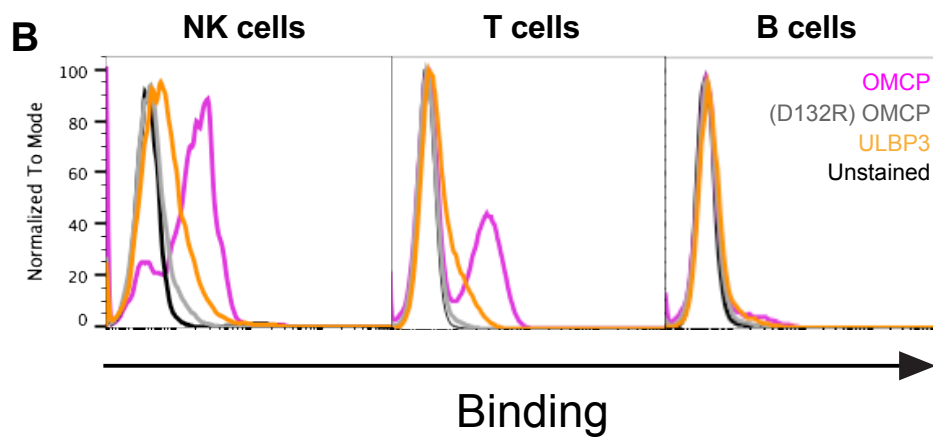

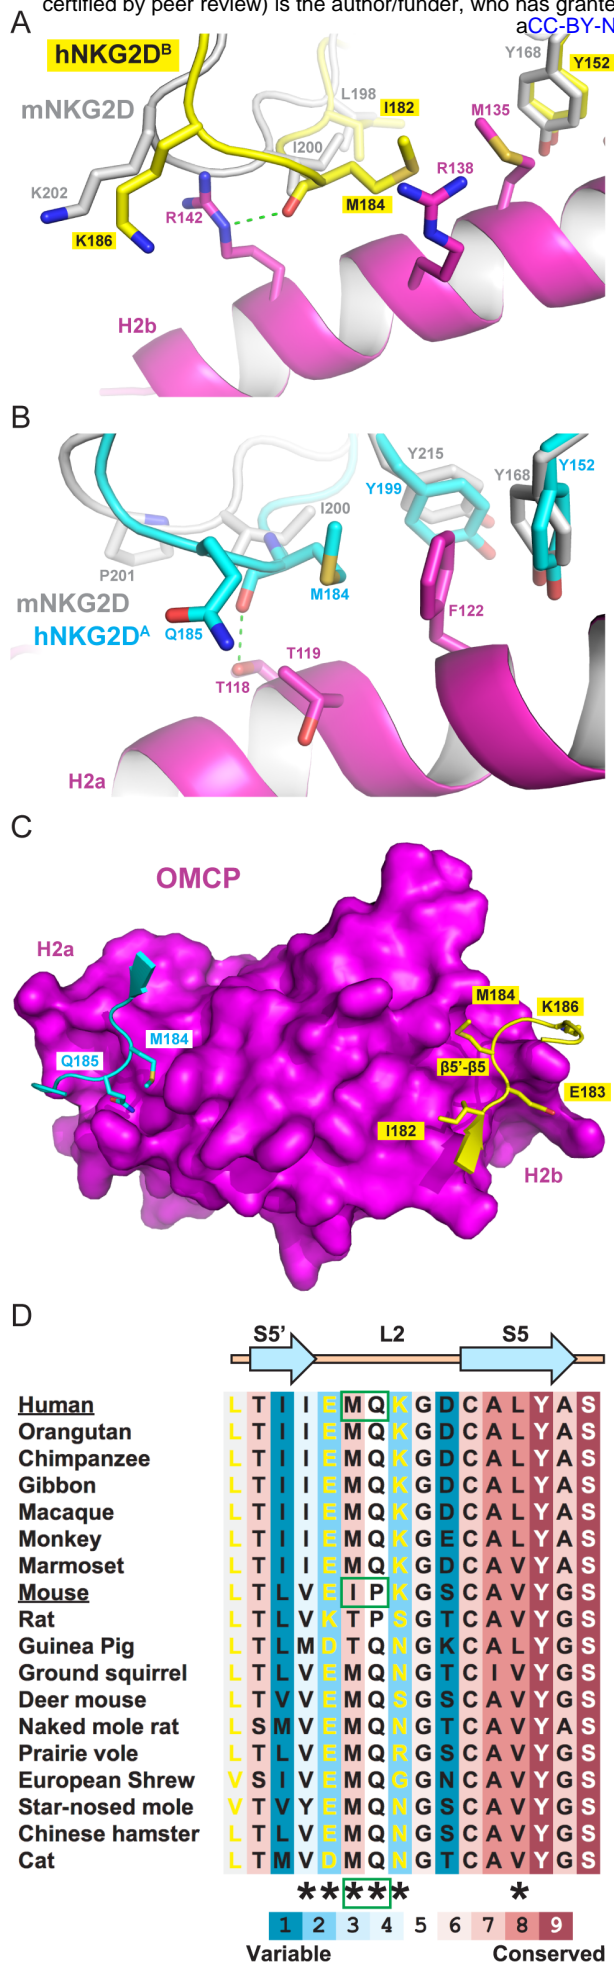

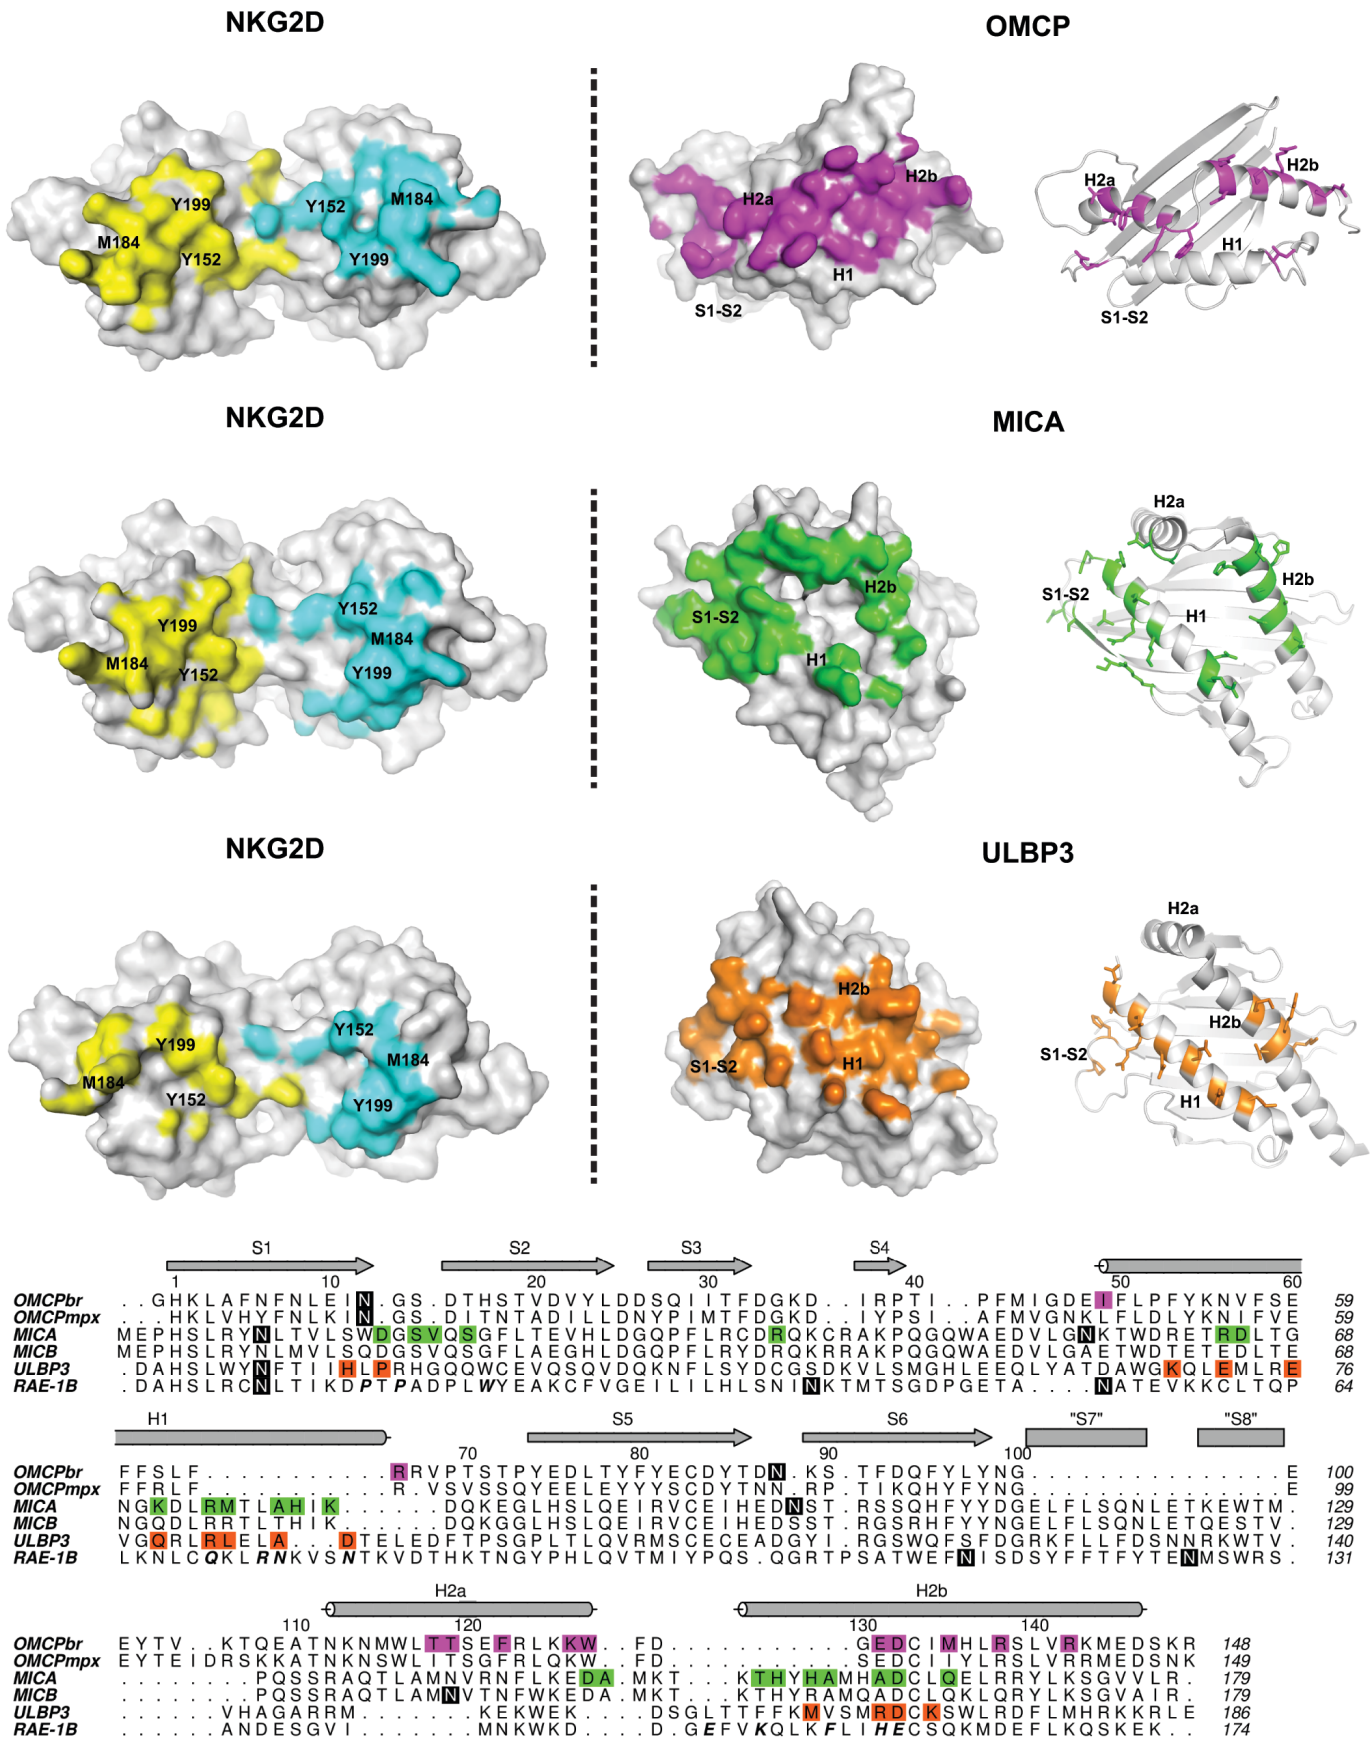

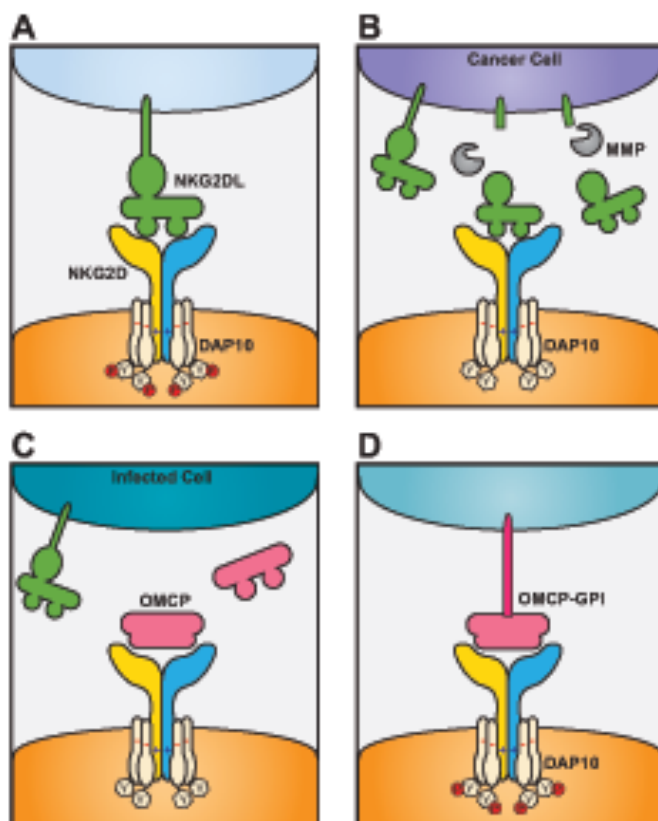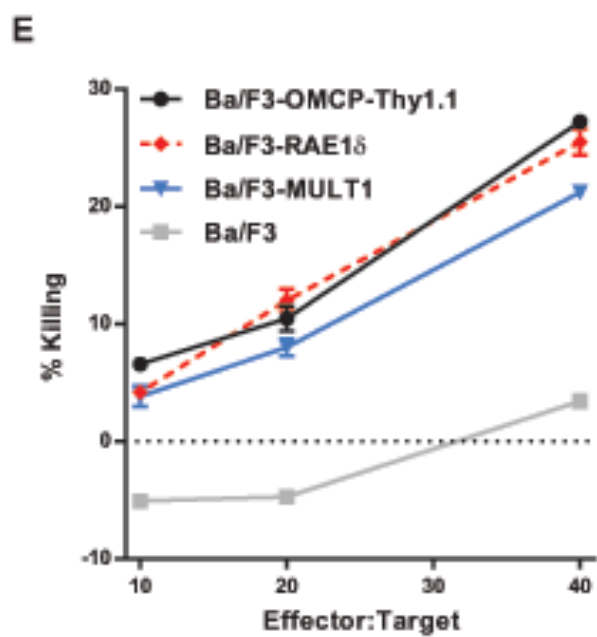

## Supplemental Figure 1

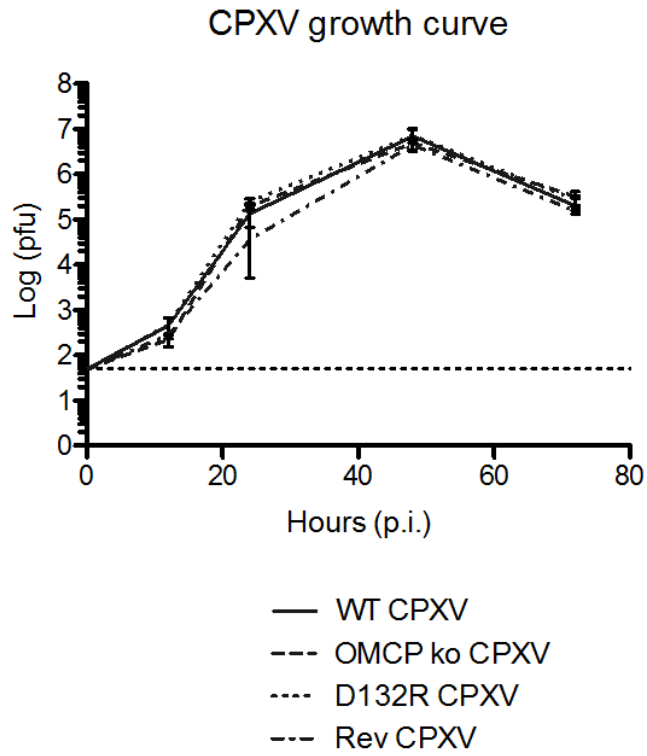

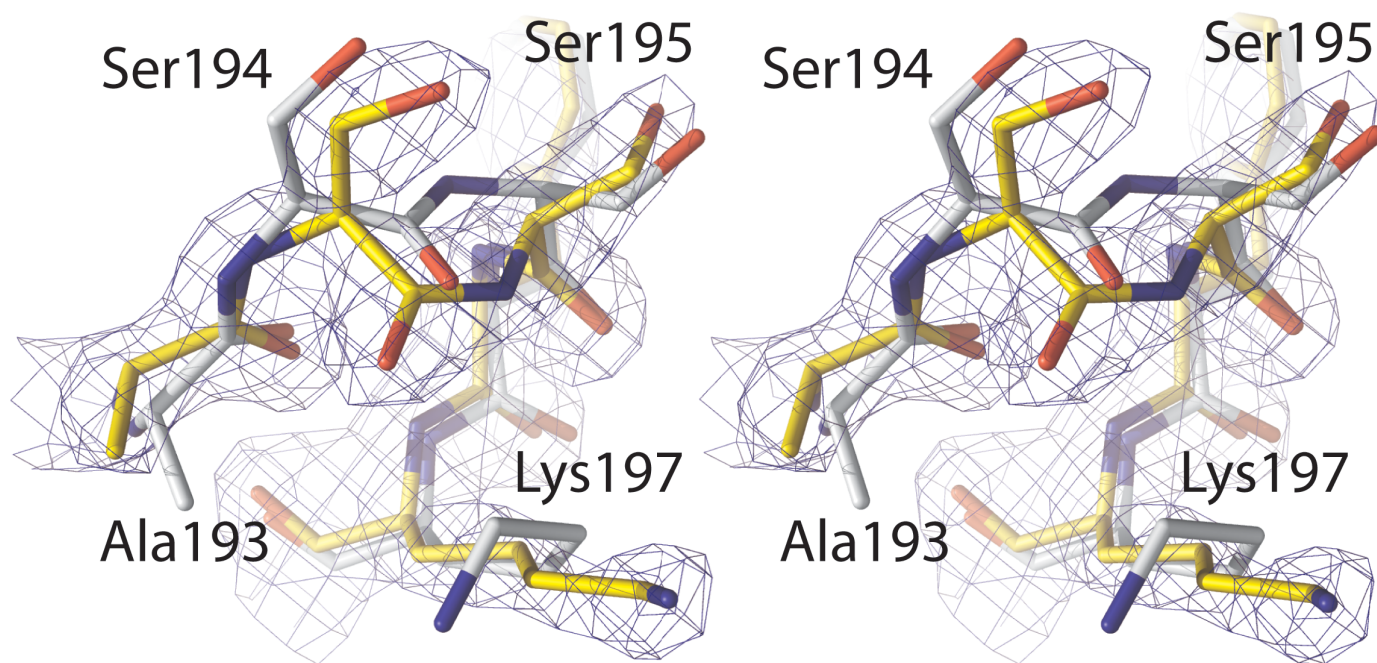



**A**

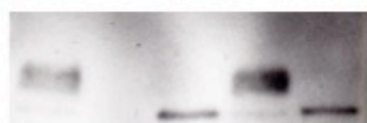

1 2 3 4 5

1: OMCP  
2: Mock  
3: (N12Q) OMCP  
4: (N88Q) OMCP  
5: (N12Q/N88Q) OMCP

**B**

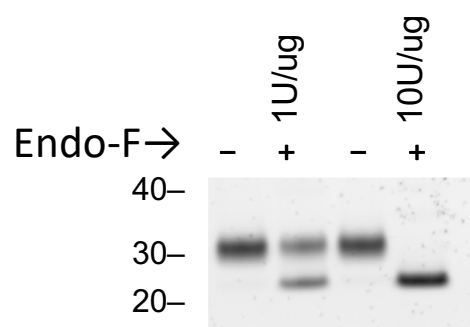

Endo-F → - + - +

40-  
30-  
20-
